# Supplementary material
Source: PubMed Central journal article supplement (PMC2546805)
Supplement: supp_190_18_6234__1.pdf [file supp_190_18_6234__1.pdf]

## SUPPLEMENTAL TABLES

**Table S1. *R. typhi* strain Wilmington *in silico* signal peptide prediction and *in vitro* ‘*phoA* gene fusion assay results.** Results are presented by each individual prediction program for each *R. typhi* protein predicted to contain a signal peptide (see Methods and Materials). For the Phobius program (P), the *Phobius: TM?* column indicates the number of transmembrane passes predicted for each protein; the *Phobius: Prediction* column indicates whether each protein was predicted to be cytoplasmic (CYT) or non-cytoplasmic (NON-CYT); the *Phobius: Signal Peptide* column indicates if a protein was predicted to contain an N-terminal signal peptide; and the *Phobius: Cleavage Site* column indicates the amino acid location and sequence of the predicted signal peptide cleavage sites. For the LipoP version 1.0 program (L), the *LipoP: Prediction* column indicates whether each protein was predicted to contain a signal peptide cleaved by signal peptidase I (SpI) or by signal peptidase II (SpII), or whether the protein was predicted to be cytoplasmic (CYT) or to contain transmembrane helices (TMH). For the SignalP version 3.0 neural network (NN) and hidden Markov model (HMM) algorithms, predictions for the presence or absence of a signal peptide and the corresponding amino acid sequence for each putative cleavage site are listed. The *Prediction Concordance* column indicates which individual programs predicted a signal peptide for each program, and the *Cleavage Site Concordance* column indicates the number of unique signal peptide cleavage sites (*i.e.*, amino acid locations) predicted by the four programs. For example, if all four programs predicted a signal peptide with the same cleavage site for a protein, then the value for the cleavage site concordance would be 4. However, if three of the programs predicted the same cleavage site, and one program predicted a cleavage site between different amino acids, then the value would be 3.1. If all four programs predicted different cleavage site locations, then the value would be 1.1.1.1.

**Table S2. Primer pair sequences and corresponding annealing temperatures for the amplification and cloning of putative *R. typhi* signal peptide sequences into ‘*phoA* gene fusion vectors.** Nucleotides in blue indicate an introduced Sac I restriction site; nucleotides in green indicate an introduced Mfe I site, and nucleotides in red indicate an introduced BamH I restriction site.

**Table S3. Quantitative, real-time PCR primer pair sequences, with corresponding annealing temperature and amplicon size.** The primers were used to amplify *R. typhi* genes from a cDNA template. All primers used had an amplification efficiency  $\geq 1.8$  and did not generate primer dimers or nonspecific amplicons.

**Table S4. *R. typhi* signal peptide predictions and 'PhoA fusion results, stratified by specific program combinations.** For each possible combination of algorithms used to identify putative signal peptides, the predicted number of signal peptides, then number tested by 'PhoA fusions, and the number found to function in *E. coli* are listed.

**Table S5: Gene expression of *R. typhi* extracytoplasmic proteins in HeLa cells.** HeLa cells were infected with *R. typhi* at an MOI of  $\sim 10$ , and the bacteria were isolated for RNA extraction at 4 days post-infection. Two-step quantitative, real-time RT-PCR was used to assess gene expression of the putative *R. typhi* extracytoplasmic proteins relative to the *rpsL* gene, calculated as the relative quantity (Q) of the corresponding cDNA (see Methods and Materials for a detailed description of the calculations). "No Ct" indicates that the fluorescence level of the sample did not cross the threshold value. Results are presented for three independent infections; for each infection, gene expression was analyzed in triplicate. All primer pairs were verified to amplify the *R. typhi* sequence of interest by sequencing the PCR amplicons.

Table S1

| Locus Tag | Product Name                                                             | Phobius: TM? | Phobius: Prediction | Phobius: Signal Peptide? | Phobius: Cleavage Site | LipoP Prediction | LipoP: Cleavage Site | SignalP: NN Prediction | SignalP: Cleavage Site (NN) | SignalP: HMM Prediction | SignalP: Cleavage Site (HMM) | Prediction Concordance | Cleavage Site Concordance | PhoA Assay Result |
|-----------|--------------------------------------------------------------------------|--------------|---------------------|--------------------------|------------------------|------------------|----------------------|------------------------|-----------------------------|-------------------------|------------------------------|------------------------|---------------------------|-------------------|
| RT0011    | hypothetical protein RT0011                                              | 0            | NON-CYT             | Y                        | SSYT-AEKA [19-20]      | SpI              | SSYT-AEKA [19-20]    | Y                      | SSYT-AEKA [19-20]           | Y                       | SSYT-AEKA [19-20]            | All                    | 4                         | NEGATIVE          |
| RT0013    | probable zinc/manganese ABC transporter substrate binding protein (ZnuA) | 0            | NON-CYT             | Y                        | TSYA-KPKI [49-50]      | SpI              | TSYA-KPKI [49-50]    | Y                      | TSYA-KPKI [49-50]           | Y                       | TSYA-KPKI [49-50]            | All                    | 4                         | POSITIVE          |
| RT0015    | 190 kDa antigen precursor (Sca1)                                         | 1            | NON-CYT             | N                        | ---                    | SpI              | AVMA-MPVE [31-32]    | Y                      | AVMA-MPVE [31-32]           | Y                       | AVMA-MPVE [31-32]            | L+NN+HMM               | 3                         | POSITIVE          |
| RT0020    | Bacterial leader peptidase I (LepB)                                      | 1            | NON-CYT             | N                        | ---                    | TMH              | ---                  | Y                      | LLIM-EPPT [34-35]           | N                       | ---                          | NN                     | 1                         | not tested        |
| RT0028    | VirB6-like protein of the type IV secretion system                       | 6            | NON-CYT             | Y                        | SCGT-DTCI [21-22]      | SpII             | LLSS-CTGD [18-19]    | Y                      | SSCT-GDTC [20-21]           | Y                       | TGDT-CIDP [23-24]            | All                    | 1.1.1.1                   | POSITIVE          |
| RT0029    | VirB6-like protein of the type IV secretion system                       | 5            | CYT                 | Y                        | PAKA-HDTF [20-21]      | SpI              | PAKA-HDTF [20-21]    | Y                      | PAKA-HDTF [20-21]           | Y                       | PAKA-HDTF [20-21]            | All                    | 4                         | POSITIVE          |
| RT0030    | VirB6-like protein of the type IV secretion system                       | 6            | NON-CYT             | Y                        | MIGA-VRIG [31-32]      | SpI              | AALG-MIGA [27-28]    | Y                      | FIFA-ALGM [24-25]           | Y                       | AALG-MIGA [27-28]            | All                    | 2.1.1                     | POSITIVE          |
| RT0031    | VirB6-like protein of the type IV secretion system                       | 6            | CYT                 | N                        | ---                    | SpI              | ESFA-GFGE [24-25]    | Y                      | ESFA-GFGE [24-25]           | Y                       | ESFA-GFGE [24-25]            | L+NN+HMM               | 3                         | not tested        |
| RT0032    | VirB6-like protein of the type IV secretion system                       | 8            | NON-CYT             | Y                        | KIHA-KDTL [28-29]      | CYT              | ---                  | Y                      | KIHA-KDTL [28-29]           | Y                       | KIHA-KDTL [28-29]            | P+NN+HMM               | 3                         | not tested        |
| RT0039    | rickettsial conserved hypothetical protein                               | 2            | NON-CYT             | Y                        | NVYS-INSS [21-22]      | TMH              | ---                  | N                      | ---                         | Y                       | NVYS-INSS [21-22]            | P+HMM                  | 2                         | NEGATIVE          |
| RT0043    | hypothetical protein RT0043                                              | 0            | NON-CYT             | Y                        | SSYS-TEKV [19-20]      | SpI              | SSYS-TEKV [19-20]    | Y                      | YSTE-KVPS [21-22]           | Y                       | SSYS-TEKV [19-20]            | All                    | 3.1                       | POSITIVE          |
| RT0044    | VacJ lipoprotein precursor                                               | 0            | NON-CYT             | Y                        | FARA-DLEY [18-19]      | SpI              | FARA-DLEY [18-19]    | Y                      | FARA-DLEY [18-19]           | Y                       | FARA-DLEY [18-19]            | All                    | 4                         | POSITIVE          |
| RT0047    | hypothetical protein RT0047                                              | 3            | NON-CYT             | N                        | ---                    | TMH              | ---                  | Y                      | YLRP-VYFT [29-30]           | N                       | ---                          | NN                     | 1                         | NEGATIVE          |
| RT0052    | 190 kDa antigen precursor (Sca 2)                                        | 0            | NON-CYT             | Y                        | ESLA-SSWN [31-32]      | SpI              | ESLA-SSWN [31-32]    | Y                      | ESLA-SSWN [31-32]           | Y                       | ESLA-SSWN [31-32]            | All                    | 4                         | POSITIVE          |
| RT0053    | protein-export membrane protein (SecG)                                   | 1            | CYT                 | Y                        | GISG-ISGD [32-33]      | TMH              | ---                  | N                      | ---                         | N                       | ---                          | P                      | 1                         | not tested        |
| RT0055    | proline/betaine transporter ProP1                                        | 12           | CYT                 | N                        | ---                    | TMH              | ---                  | Y                      | SSIA-NTFE [13-14]           | N                       | ---                          | NN                     | 1                         | not tested        |
| RT0056    | hypothetical protein RT0056                                              | 9            | CYT                 | Y                        | SVND-VISK [26-27]      | TMH              | ---                  | N                      | ---                         | N                       | ---                          | P                      | 1                         | POSITIVE          |
| RT0057    | OmpW-like outer membrane protein                                         | 0            | NON-CYT             | Y                        | NSHA-KNMY [20-21]      | SpI              | NSHA-KNMY [20-21]    | Y                      | NSHA-KNMY [20-21]           | Y                       | NSHA-KNMY [20-21]            | All                    | 4                         | POSITIVE          |
| RT0058    | NAD(P)(+) transhydrogenase (B-specific) beta subunit (PntB)              | 9            | CYT                 | N                        | ---                    | TMH              | ---                  | Y                      | QKQA-RLGS [30-31]           | N                       | ---                          | NN                     | 1                         | not tested        |
| RT0064    | rickettsial conserved hypothetical protein                               | 0            | NON-CYT             | Y                        | VSLA-EEKT [19-20]      | SpI              | VSLA-EEKT [19-20]    | Y                      | VSLA-EEKT [19-20]           | Y                       | VSLA-EEKT [19-20]            | All                    | 4                         | POSITIVE          |
| RT0080    | rickettsial conserved hypothetical protein                               | 0            | NON-CYT             | Y                        | GCFA-NSTT [20-21]      | SpII             | LSTG-CFAN [17-18]    | Y                      | GCFA-NSTT [20-21]           | Y                       | GCFA-NSTT [20-21]            | All                    | 3.1                       | POSITIVE          |
| RT0081    | 3-phosphatidyl-1prime-glycerol-3prime-phosphate synthase (PgsA)          | 5            | CYT                 | N                        | ---                    | TMH              | ---                  | Y                      | NSLA-RKLG [30-31]           | N                       | ---                          | NN                     | 1                         | not tested        |
| RT0083    | hypothetical protein RT0083                                              | 5            | CYT                 | N                        | ---                    | CYT              | ---                  | Y                      | IPLI-KRLI [32-33]           | N                       | ---                          | NN                     | 1                         | NEGATIVE          |
| RT0087    | cell division protein FtsH                                               | 2            | CYT                 | N                        | ---                    | TMH              | ---                  | Y                      | VFQS-DGLL [27-28]           | Y                       | NVFQ-SDGL [26-27]            | NN+HMM                 | 1.1                       | not tested        |
| RT0103    | hypothetical protein RT0103                                              | 0            | NON-CYT             | Y                        | EVKA-QDKQ [21-22]      | SpII             | FLSS-CAEV [15-16]    | Y                      | SSCA-EVKA [17-18]           | Y                       | EVKA-QDKQ [21-22]            | All                    | 2.1.1                     | POSITIVE          |
| RT0107    | ATP synthase subunit B (AtpX)                                            | 1            | CYT                 | N                        | ---                    | CYT              | ---                  | Y                      | APNA-EEIF [35-36]           | N                       | ---                          | NN                     | 1                         | not tested        |

Table S1

| Locus Tag | Product Name                                               | Phobius: TM? | Phobius: Prediction | Phobius: Signal Peptide? | Phobius: Cleavage Site | LipoP Prediction | LipoP: Cleavage Site | SignalP: NN Prediction | SignalP: Cleavage Site (NN) | SignalP: HMM Prediction | SignalP: Cleavage Site (HMM) | Prediction Concordance | Cleavage Site Concordance | PhoA Assay Result |
|-----------|------------------------------------------------------------|--------------|---------------------|--------------------------|------------------------|------------------|----------------------|------------------------|-----------------------------|-------------------------|------------------------------|------------------------|---------------------------|-------------------|
| RT0112    | protease activity modulator protein HflC                   | 1            | CYT                 | N                        | ---                    | CYT              | ---                  | Y                      | SLFS-VDQR [25-26]           | Y                       | SLFS-VDQR [25-26]            | NN+HMM                 | 2                         | not tested        |
| RT0113    | serine protease, HtrA/DegQ/DegS family                     | 0            | NON-CYT             | Y                        | IILA-KENS [21-22]      | CYT              | ---                  | Y                      | IILA-KENS [21-22]           | Y                       | IILA-KENS [21-22]            | P+NN+HMM               | 3                         | not tested        |
| RT0117    | succinate dehydrogenase (SdhA)                             | 0            | CYT                 | N                        | ---                    | SpI              | FGMA-KEGL [31-32]    | N                      | ---                         | N                       | ---                          | L                      | 1                         | not tested        |
| RT0119    | 30S ribosomal protein S12 (RpsL)                           | 0            | CYT                 | N                        | ---                    | CYT              | ---                  | Y                      | SKIR-KTKS [17-18]           | N                       | ---                          | NN                     | 1                         | not tested        |
| RT0125    | 50S ribosomal protein L11 (RplK)                           | 0            | CYT                 | N                        | ---                    | SpI              | PALG-QRKV [30-31]    | Y                      | PAAG-ATPA [18-19]           | N                       | ---                          | L+NN                   | 1.1                       | not tested        |
| RT0136    | conserved hypothetical protein (integral membrane protein) | 7            | NON-CYT             | N                        | ---                    | CYT              | ---                  | Y                      | GVAA-ITTI [43-44]           | N                       | ---                          | NN                     | 1                         | POSITIVE          |
| RT0139    | glutamine-binding periplasmic protein GlnH                 | 0            | NON-CYT             | Y                        | SCEK-KETE [18-19]      | CYT              | ---                  | N                      | ---                         | N                       | ---                          | P                      | 1                         | not tested        |
| RT0140    | aspartyl/glutamyl-tRNA amidotransferase subunit B (GatB)   | 0            | CYT                 | N                        | ---                    | CYT              | ---                  | Y                      | TLFA-ASPEN [38-39]          | N                       | ---                          | NN                     | 1                         | not tested        |
| RT0146    | multidrug resistance protein B (EmrB)                      | 14           | CYT                 | N                        | ---                    | TMH              | ---                  | N                      | ---                         | Y                       | MSVL-DIQI [31-32]            | HMM                    | 1                         | not tested        |
| RT0150    | outer membrane protein OmpI                                | 0            | NON-CYT             | Y                        | ISFA-DDVI [24-25]      | SpI              | ISFA-DDVI [24-25]    | Y                      | ISFA-DDVI [24-25]           | Y                       | ISFA-DDVI [24-25]            | All                    | 4                         | POSITIVE          |
| RT0151    | probable membrane associated zinc metalloprotease          | 3            | CYT                 | Y                        | YCIA-RYLD [26-27]      | CYT              | ---                  | N                      | ---                         | N                       | ---                          | P                      | 1                         | not tested        |
| RT0165    | post-proline cleaving enzyme (PpcE)                        | 0            | NON-CYT             | Y                        | CIDA-MEDN [19-20]      | CYT              | ---                  | N                      | ---                         | N                       | ---                          | P                      | 1                         | not tested        |
| RT0174    | probable lipoprotein                                       | 0            | NON-CYT             | Y                        | GCKS-KKNS [22-23]      | SpII             | ILSG-CKSK [19-20]    | Y                      | KKNS-NDIV [26-27]           | Y                       | KSKK-NSND [24-25]            | All                    | 1.1.1.1                   | POSITIVE          |
| RT0177    | serine protease, HtrA/DegQ/DegS family                     | 0            | NON-CYT             | Y                        | IVLA-SSDT [32-33]      | SpI              | IVLA-SSDT [32-33]    | N                      | ---                         | Y                       | IVLA-SSDT [32-33]            | P+L+HMM                | 3                         | not tested        |
| RT0178    | rickettsial conserved hypothetical protein                 | 0            | NON-CYT             | Y                        | SCNL-KSVY [18-19]      | SpII             | LMSS-CNLK [15-16]    | N                      | ---                         | N                       | ---                          | P+L                    | 1.1                       | POSITIVE          |
| RT0182    | rickettsial conserved hypothetical protein                 | 1            | CYT                 | N                        | ---                    | CYT              | ---                  | Y                      | NCNT-QFIV [10-11]           | N                       | ---                          | NN                     | 1                         | NEGATIVE          |
| RT0187    | hypothetical protein RT0187                                | 0            | NON-CYT             | Y                        | NIYA-ATKI [21-22]      | SpI              | NIYA-ATKI [21-22]    | Y                      | NIYA-ATKI [21-22]           | Y                       | NIYA-ATKI [21-22]            | All                    | 4                         | POSITIVE          |
| RT0188    | rickettsial conserved hypothetical protein                 | 0            | NON-CYT             | Y                        | FSTA-YTIK [21-22]      | SpI              | FSTA-YTIK [21-22]    | Y                      | FSTA-YTIK [21-22]           | Y                       | FSTA-YTIK [21-22]            | All                    | 4                         | POSITIVE          |
| RT0199    | hypothetical protein RT0199                                | 0            | CYT                 | N                        | ---                    | CYT              | ---                  | Y                      | VKSA-NSNI [25-26]           | N                       | ---                          | NN                     | 1                         | NEGATIVE          |
| RT0216    | outer membrane protein TolC precursor                      | 0            | NON-CYT             | Y                        | SVIA-VDLE [19-20]      | SpI              | SVIA-VDLE [19-20]    | Y                      | SVIA-VDLE [19-20]           | Y                       | SVIA-VDLE [19-20]            | All                    | 4                         | POSITIVE          |
| RT0218    | rickettsial conserved hypothetical protein                 | 0            | NON-CYT             | Y                        | QGYA-SPPP [23-24]      | SpI              | QGYA-SPPP [23-24]    | Y                      | QGYA-SPPP [23-24]           | Y                       | QGYA-SPPP [23-24]            | All                    | 4                         | POSITIVE          |
| RT0220    | tail specific periplasmic protease precursor (Ctp)         | 0            | NON-CYT             | Y                        | VVEG-KETE [19-20]      | CYT              | ---                  | N                      | ---                         | N                       | ---                          | P                      | 1                         | not tested        |
| RT0222    | hypothetical protein RT0222                                | 0            | NON-CYT             | Y                        | ILQG-RPLK [22-23]      | CYT              | ---                  | N                      | ---                         | N                       | ---                          | P                      | 1                         | POSITIVE          |
| RT0224    | hypothetical protein RT0224                                | 0            | NON-CYT             | Y                        | SCNG-LGSK [28-29]      | SpII             | ILIS-CNGL [25-26]    | Y                      | ILIS-CNGL [25-26]           | N                       | ---                          | P+L+NN                 | 2.1                       | POSITIVE          |
| RT0235    | multidrug resistance protein A (EmrA)                      | 1            | NON-CYT             | N                        | ---                    | TMH              | ---                  | Y                      | YVWA-NTQS [40-41]           | N                       | ---                          | NN                     | 1                         | not tested        |
| RT0242    | cell division protein FtsQ                                 | 1            | NON-CYT             | N                        | ---                    | SpI              | FVFT-KYFT [49-50]    | N                      | ---                         | Y                       | FVFT-KYFT [49-50]            | L+HMM                  | 2                         | not tested        |

Table S1

| Locus Tag | Product Name                                                        | Phobius: TM? | Phobius: Prediction | Phobius: Signal Peptide? | Phobius: Cleavage Site | LipoP Prediction | LipoP: Cleavage Site | SignalP: NN Prediction | SignalP: Cleavage Site (NN) | SignalP: HMM Prediction | SignalP: Cleavage Site (HMM) | Prediction Concordance | Cleavage Site Concordance | PhoA Assay Result |
|-----------|---------------------------------------------------------------------|--------------|---------------------|--------------------------|------------------------|------------------|----------------------|------------------------|-----------------------------|-------------------------|------------------------------|------------------------|---------------------------|-------------------|
| RT0245    | cytochrome c (CycM)                                                 | 1            | NON-CYT             | N                        | ---                    | SpI              | VRFV-ANIL [26-27]    | Y                      | RFVA-NILY [27-28]           | Y                       | VRFV-ANIL [26-27]            | L+NN+HMM               | 2.1                       | not tested        |
| RT0247    | rickettsial conserved hypothetical protein                          | 12           | CYT                 | N                        | ---                    | TMH              | ---                  | Y                      | CINA-INFY [25-26]           | N                       | ---                          | NN                     | 1                         | POSITIVE          |
| RT0250    | penicillin binding protein 4* (PbpE)                                | 0            | NON-CYT             | Y                        | YCFA-DIQQ [44-45]      | TMH              | ---                  | N                      | ---                         | Y                       | YCFA-DIQQ [44-45]            | P+HMM                  | 2                         | not tested        |
| RT0258    | hypothetical protein RT0258                                         | 9            | CYT                 | N                        | ---                    | TMH              | ---                  | Y                      | IIFA-KDLL [33-34]           | N                       | ---                          | NN                     | 1                         | NEGATIVE          |
| RT0260    | rickettsial conserved hypothetical protein                          | 1            | CYT                 | N                        | ---                    | TMH              | ---                  | Y                      | IAVA-SLIT [32-33]           | N                       | ---                          | NN                     | 1                         | POSITIVE          |
| RT0261    | complex III (mitochondrial electron transport) (PetA)               | 1            | NON-CYT             | N                        | ---                    | TMH              | ---                  | Y                      | AACA-FWPI [33-34]           | Y                       | AACA-FWPI [33-34]            | NN+HMM                 | 2                         | not tested        |
| RT0263    | cytochrome c1 heme protein precursor (FbcH)                         | 1            | CYT                 | Y                        | LSIA-NTEA [20-21]      | SpI              | LSIA-NTEA [20-21]    | Y                      | LSIA-NTEA [20-21]           | Y                       | LSIA-NTEA [20-21]            | All                    | 4                         | POSITIVE          |
| RT0264    | HSP22-like heat shock protein                                       | 0            | NON-CYT             | Y                        | IAIA-SKNY [20-21]      | CYT              | ---                  | Y                      | IAIA-SKNY [20-21]           | Y                       | IAIA-SKNY [20-21]            | P+NN+HMM               | 3                         | not tested        |
| RT0271    | rod shape determining protein (RodA)                                | 9            | CYT                 | N                        | ---                    | TMH              | ---                  | N                      | ---                         | Y                       | YSAA-NSNL [35-36]            | HMM                    | 1                         | not tested        |
| RT0274    | NADH dehydrogenase subunit N                                        | 13           | CYT                 | Y                        | SPYA-TKKD [28-29]      | TMH              | ---                  | N                      | ---                         | Y                       | YATK-KDSF [30-31]            | P+HMM                  | 1.1                       | not tested        |
| RT0275    | NADH dehydrogenase subunit N                                        | 13           | CYT                 | N                        | ---                    | TMH              | ---                  | N                      | ---                         | Y                       | IIFA-RVIT [32-33]            | HMM                    | 1                         | not tested        |
| RT0276    | hypothetical protein RT0276                                         | 3            | CYT                 | N                        | ---                    | TMH              | ---                  | Y                      | TSHN-YIHK [25-26]           | N                       | ---                          | NN                     | 1                         | POSITIVE          |
| RT0277    | probable VirB9-like conjugal transfer protein precursor (TrbG)      | 0            | NON-CYT             | Y                        | DVFA-LTMS [19-20]      | CYT              | ---                  | N                      | ---                         | Y                       | DVFA-LTMS [19-20]            | P+HMM                  | 2                         | not tested        |
| RT0279    | rickettsial conserved hypothetical protein                          | 0            | NON-CYT             | Y                        | CTPS-APYE [23-24]      | SpII             | QLLS-CTPS [19-20]    | Y                      | TPSA-PYEI [24-25]           | Y                       | QLLS-CTPS [19-20]            | All                    | 2.1.1                     | POSITIVE          |
| RT0281    | VirB9 protein precursor of the type IV secretion system             | 0            | NON-CYT             | Y                        | TAQR-ACPV [21-22]      | SpI              | AQRA-CPVV [22-23]    | Y                      | AQRA-CPVV [22-23]           | Y                       | AQRA-CPVV [22-23]            | All                    | 3.1                       | POSITIVE          |
| RT0286    | rickettsial conserved hypothetical protein                          | 0            | NON-CYT             | Y                        | LVKA-EIIE [19-20]      | SpI              | LVKA-EIIE [19-20]    | N                      | ---                         | Y                       | LVKA-EIIE [19-20]            | P+L+HMM                | 3                         | POSITIVE          |
| RT0287    | rickettsial conserved hypothetical protein                          | 0            | NON-CYT             | Y                        | AGYS-QIIP [22-23]      | SpI              | YSQI-IPTY [24-25]    | Y                      | IAYA-GYSQ [19-20]           | Y                       | IAYA-GYSQ [19-20]            | All                    | 2.1.1                     | POSITIVE          |
| RT0291    | outer membrane antigenic lipoprotein B precursor (NlpD)             | 0            | NON-CYT             | Y                        | CVDQ-SPAP [21-22]      | SpII             | CLVS-CVDQ [17-18]    | N                      | ---                         | Y                       | VSCV-DQSP [19-20]            | P+L+HMM                | 1.1.1                     | POSITIVE          |
| RT0293    | translocation protein TolB precursor                                | 0            | NON-CYT             | Y                        | TGYA-LETI [18-19]      | CYT              | ---                  | Y                      | TGYA-LETI [18-19]           | Y                       | TGYA-LETI [18-19]            | P+NN+HMM               | 3                         | not tested        |
| RT0296    | tRNA (5-methylaminomethyl-2-thiouridylate)-methyltransferase (TrmU) | 0            | CYT                 | N                        | ---                    | CYT              | ---                  | Y                      | SAVA-AMLH [18-19]           | N                       | ---                          | NN                     | 1                         | not tested        |
| RT0300    | ToIR protein                                                        | 1            | NON-CYT             | N                        | ---                    | CYT              | ---                  | Y                      | MLVS-GVNV [45-46]           | N                       | ---                          | NN                     | 1                         | not tested        |
| RT0301    | rickettsial conserved hypothetical protein                          | 1            | NON-CYT             | N                        | ---                    | CYT              | ---                  | Y                      | SLLN-KKFP [37-38]           | N                       | ---                          | NN                     | 1                         | POSITIVE          |
| RT0305    | alkaline proteinase secretion ATP-binding protein (AprD)            | 3            | NON-CYT             | N                        | ---                    | TMH              | ---                  | Y                      | AFVI-NLLM [34-35]           | N                       | ---                          | NN                     | 1                         | not tested        |
| RT0312    | hypothetical protein RT0312                                         | 1            | NON-CYT             | N                        | ---                    | TMH              | ---                  | N                      | ---                         | Y                       | GNLA-QNKT [40-41]            | HMM                    | 1                         | POSITIVE          |
| RT0319    | hypothetical protein RT0319                                         | 0            | NON-CYT             | Y                        | IIQM-VKVV [19-20]      | CYT              | ---                  | N                      | ---                         | N                       | ---                          | P                      | 1                         | NEGATIVE          |
| RT0322    | tTDP-4-keto-L-rhamnose reductase (RmlD)                             | 0            | NON-CYT             | Y                        | RFLT-QDSK [21-22]      | CYT              | ---                  | Y                      | GMLG-NSMF [13-14]           | N                       | ---                          | P+NN                   | 1.1                       | not tested        |

Table S1

| Locus Tag | Product Name                                             | Phobius: TM? | Phobius: Prediction | Phobius: Signal Peptide? | Phobius: Cleavage Site | LipoP Prediction | LipoP: Cleavage Site | SignalP: NN Prediction | SignalP: Cleavage Site (NN) | SignalP: HMM Prediction | SignalP: Cleavage Site (HMM) | Prediction Concordance | Cleavage Site Concordance | PhoA Assay Result |
|-----------|----------------------------------------------------------|--------------|---------------------|--------------------------|------------------------|------------------|----------------------|------------------------|-----------------------------|-------------------------|------------------------------|------------------------|---------------------------|-------------------|
| RT0331    | probable efflux transporter                              | 0            | NON-CYT             | Y                        | IANK-KEEE [21-22]      | SpI              | IANK-KEEE [21-22]    | Y                      | STIA-NKKE [19-20]           | Y                       | IANK-KEEE [21-22]            | All                    | 3.1                       | POSITIVE          |
| RT0335    | 30S ribosomal protein S4 (RpsD)                          | 0            | CYT                 | N                        | ---                    | CYT              | ---                  | Y                      | SLWG-DSKD [21-22]           | N                       | ---                          | NN                     | 1                         | not tested        |
| RT0338    | rickettsial conserved hypothetical protein               | 1            | NON-CYT             | N                        | ---                    | TMH              | ---                  | N                      | ---                         | Y                       | SVLS-FMNY [24-25]            | HMM                    | 1                         | POSITIVE          |
| RT0341    | hypothetical protein RT0341                              | 0            | NON-CYT             | Y                        | PLLG-NNCI [21-22]      | CYT              | ---                  | N                      | ---                         | N                       | ---                          | P                      | 1                         | POSITIVE          |
| RT0347    | hypothetical protein RT0347                              | 9            | CYT                 | Y                        | PSLG-MLTG [16-17]      | TMH              | ---                  | N                      | ---                         | Y                       | LSIA-ATVL [24-25]            | P+HMM                  | 1.1                       | NEGATIVE          |
| RT0348    | hypothetical protein RT0348                              | 0            | NON-CYT             | Y                        | FVLA-ENLE [22-23]      | CYT              | ---                  | N                      | ---                         | N                       | ---                          | P                      | 1                         | POSITIVE          |
| RT0354    | apolipoprotein N-acyltransferase (Lnt)                   | 7            | CYT                 | N                        | ---                    | TMH              | ---                  | Y                      | LVFA-PTFF [20-21]           | Y                       | ALFT-FSYL [30-31]            | NN+HMM                 | 1.1                       | not tested        |
| RT0355    | hypothetical protein RT0355                              | 0            | NON-CYT             | Y                        | LVYA-NQKK [27-28]      | SpI              | LVYA-NQKK [27-28]    | Y                      | LVYA-NQKK [27-28]           | Y                       | LVYA-NQKK [27-28]            | All                    | 4                         | POSITIVE          |
| RT0358    | rickettsial conserved hypothetical protein               | 4            | CYT                 | N                        | ---                    | TMH              | ---                  | N                      | ---                         | Y                       | LSTA-YIAE [32-33]            | HMM                    | 1                         | POSITIVE          |
| RT0363    | proline/betaine transporter ProP3                        | 11           | CYT                 | Y                        | GLSA-NILA [27-28]      | TMH              | ---                  | N                      | ---                         | N                       | ---                          | P                      | 1                         | not tested        |
| RT0367    | CTP synthetase (PyrG)                                    | 0            | NON-CYT             | Y                        | GITA-ASLA [21-22]      | CYT              | ---                  | Y                      | LLQA-KGFR [30-31]           | N                       | ---                          | P+NN                   | 1.1                       | not tested        |
| RT0377    | D-alanyl-D-alanine carboxypeptidase (DacF)               | 0            | NON-CYT             | Y                        | ISEA-KKIV [23-24]      | SpI              | ISEA-KKIV [23-24]    | Y                      | ISEA-KKIV [23-24]           | Y                       | ISEA-KKIV [23-24]            | All                    | 4                         | POSITIVE          |
| RT0379    | possible periplasmic protein                             | 0            | NON-CYT             | Y                        | AVTA-TGIV [28-29]      | SpI              | AVTA-TGIV [28-29]    | Y                      | IFTA-VTAT [25-26]           | Y                       | TAVT-ATGI [27-28]            | All                    | 2.1.1                     | POSITIVE          |
| RT0382    | hypothetical protein RT0382                              | 1            | NON-CYT             | N                        | ---                    | CYT              | ---                  | N                      | ---                         | Y                       | YLYK-SNGS [27-28]            | HMM                    | 1                         | POSITIVE          |
| RT0383    | rickettsial conserved hypothetical protein               | 0            | NON-CYT             | Y                        | IVKL-KIYP [20-21]      | CYT              | ---                  | N                      | ---                         | N                       | ---                          | P                      | 1                         | POSITIVE          |
| RT0384    | protocatechuate oxygenase (PcaH)                         | 0            | NON-CYT             | Y                        | NIFA-VSKI [18-19]      | CYT              | ---                  | Y                      | NIFA-VSKI [18-19]           | N                       | ---                          | P+NN                   | 2                         | not tested        |
| RT0385    | thiol-disulfide interchange protein (TlpA)               | 1            | CYT                 | 0                        | ---                    | CYT              | ---                  | Y                      | KIQA-KLYE [28-29]           | N                       | ---                          | NN                     | 1                         | not tested        |
| RT0388    | soluble lytic transglycosylase domain containing protein | 0            | NON-CYT             | Y                        | KVNA-NSDS [19-20]      | SpI              | KVNA-NSDS [19-20]    | Y                      | KVNA-NSDS [19-20]           | Y                       | KVNA-NSDS [19-20]            | All                    | 4                         | POSITIVE          |
| RT0390    | carboxypeptidase IIW (LcdA)                              | 0            | NON-CYT             | Y                        | SVFS-VSNS [20-21]      | SpI              | SVFS-VSNS [20-21]    | Y                      | SVFS-VSNS [20-21]           | Y                       | SVFS-VSNS [20-21]            | All                    | 4                         | POSITIVE          |
| RT0393    | hypothetical protein RT0393                              | 1            | NON-CYT             | N                        | ---                    | SpI              | VSFA-INNY [45-46]    | Y                      | VSFA-INNY [45-46]           | Y                       | VSFA-INNY [45-46]            | L+NN+HMM               | 3                         | POSITIVE          |
| RT0394    | signal peptidase II (LspA)                               | 5            | CYT                 | N                        | ---                    | TMH              | ---                  | Y                      | SSRI-IITL [18-19]           | N                       | ---                          | NN                     | 1                         | not tested        |
| RT0395    | rickettsial conserved hypothetical protein               | 0            | NON-CYT             | Y                        | ITSA-CNKK [16-17]      | SpII             | ITSA-CNKK [16-17]    | Y                      | SACN-KKLE [18-19]           | Y                       | ACNK-KLKE [19-20]            | All                    | 2.1.1                     | POSITIVE          |
| RT0397    | cell division protein FtsW                               | 8            | CYT                 | N                        | ---                    | TMH              | ---                  | Y                      | SLML-VTTS [35-36]           | Y                       | SIVA-SRIG [44-45]            | NN+HMM                 | 1.1                       | not tested        |
| RT0398    | N-acetylglucosaminyl transferase (MurG)                  | 2            | NON-CYT             | Y                        | VALG-EELI [22-23]      | CYT              | ---                  | N                      | ---                         | Y                       | VALG-EELI [22-23]            | P+HMM                  | 2                         | not tested        |
| RT0399    | rickettsial conserved hypothetical protein               | 0            | NON-CYT             | Y                        | SSCT-DNFR [19-20]      | SpII             | LLSS-CTDN [17-18]    | Y                      | TDNF-RNYF [22-23]           | Y                       | SSCT-DNFR [19-20]            | All                    | 2.1.1                     | POSITIVE          |
| RT0406    | hypothetical protein RT0406                              | 0            | NON-CYT             | Y                        | SILA-YDYP [21-22]      | SpI              | SILA-YDYP [21-22]    | Y                      | SILA-YDYP [21-22]           | Y                       | SILA-YDYP [21-22]            | All                    | 4                         | POSITIVE          |

Table S1

| Locus Tag | Product Name                                                     | Phobius: TM? | Phobius: Prediction | Phobius: Signal Peptide? | Phobius: Cleavage Site | LipoP Prediction | LipoP: Cleavage Site | SignalP: NN Prediction | SignalP: Cleavage Site (NN) | SignalP: HMM Prediction | SignalP: Cleavage Site (HMM) | Prediction Concordance | Cleavage Site Concordance | PhoA Assay Result |
|-----------|------------------------------------------------------------------|--------------|---------------------|--------------------------|------------------------|------------------|----------------------|------------------------|-----------------------------|-------------------------|------------------------------|------------------------|---------------------------|-------------------|
| RT0417    | hypothetical protein RT0417                                      | 0            | NON-CYT             | Y                        | VVKT-IKTY [24-25]      | CYT              | ---                  | N                      | ---                         | N                       | ---                          | P                      | 1                         | POSITIVE          |
| RT0419    | succinyl-CoA synthetase alpha subunit (SucD)                     | 0            | CYT                 | N                        | ---                    | CYT              | ---                  | Y                      | QAIA-YGTN [30-31]           | N                       | ---                          | NN                     | 1                         | not tested        |
| RT0429    | NAD(P)H-dependent glycerol-3-phosphate dehydrogenase (GpsA)      | 0            | NON-CYT             | Y                        | TSLA-SVVA [20-21]      | SpI              | TSLA-SVVA [20-21]    | N                      | ---                         | Y                       | TSLA-SVVA [20-21]            | P+L+HMM                | 3                         | not tested        |
| RT0432    | NADP-thioredoxin reductase (TrxB1)                               | 0            | NON-CYT             | Y                        | GLSA-AIYT [19-20]      | SpI              | GLSA-AIYT [19-20]    | Y                      | GLSA-AIYT [19-20]           | Y                       | GLSA-AIYT [19-20]            | All                    | 4                         | NEGATIVE          |
| RT0437    | ATP-dependent protease La (Lon)                                  | 0            | NON-CYT             | Y                        | SLQA-LSRT [34-35]      | CYT              | ---                  | Y                      | GVIA-PIFV [22-23]           | N                       | ---                          | P+NN                   | 1.1                       | not tested        |
| RT0438    | cell surface antigen Sca3                                        | 0            | NON-CYT             | Y                        | NSNA-TGAI [26-27]      | SpI              | NATG-AIIP [28-29]    | Y                      | NATG-AIIP [28-29]           | Y                       | NATG-AIIP [28-29]            | All                    | 3.1                       | POSITIVE          |
| RT0443    | 50S ribosomal protein L36 (RpmJ)                                 | 0            | CYT                 | N                        | ---                    | CYT              | ---                  | Y                      | MKV-VSSL [3-4]              | N                       | ---                          | NN                     | 1                         | not tested        |
| RT0444    | hypothetical protein RT0444                                      | 1            | NON-CYT             | N                        | ---                    | CYT              | ---                  | N                      | ---                         | Y                       | QIIA-DPEI [51-52]            | HMM                    | 1                         | POSITIVE          |
| RT0445    | rickettsial conserved hypothetical protein                       | 0            | NON-CYT             | Y                        | KVNA-DLNH [20-21]      | CYT              | ---                  | Y                      | KVNA-DLNH [20-21]           | Y                       | KVNA-DLNH [20-21]            | P+NN+HMM               | 3                         | POSITIVE          |
| RT0456    | probable 1-acyl-sn-glycerol-3-phosphate O-acyltransferase (PlsC) | 2            | CYT                 | N                        | ---                    | TMH              | ---                  | Y                      | IPFL-ICYI [24-25]           | N                       | ---                          | NN                     | 1                         | not tested        |
| RT0459    | rickettsial conserved hypothetical protein                       | 1            | CYT                 | Y                        | SGFT-FIEH [19-20]      | TMH              | ---                  | N                      | ---                         | N                       | ---                          | P                      | 1                         | NEGATIVE          |
| RT0463    | possible lipopolysaccharide 1,2-glucosyltransferase WaaJ         | 1            | CYT                 | N                        | ---                    | CYT              | ---                  | Y                      | YRMH-KNTN [30-31]           | N                       | ---                          | NN                     | 1                         | not tested        |
| RT0465    | rickettsial conserved hypothetical protein                       | 1            | NON-CYT             | N                        | ---                    | TMH              | ---                  | Y                      | SRSI-NQKY [34-35]           | Y                       | LVYS-GLWF [20-21]            | NN+HMM                 | 1.1                       | POSITIVE          |
| RT0470    | putrescine-ornithine antiporter (PotE)                           | 12           | CYT                 | N                        | ---                    | TMH              | ---                  | Y                      | SVFA-LVTG [12-13]           | N                       | ---                          | NN                     | 1                         | not tested        |
| RT0473    | cysteine desulfurase (IscS1)                                     | 0            | CYT                 | N                        | ---                    | CYT              | ---                  | Y                      | NQQL-KNLT [5-6]             | N                       | ---                          | NN                     | 1                         | not tested        |
| RT0475    | rickettsial conserved hypothetical protein                       | 5            | CYT                 | Y                        | TLVR-QLLL [16-17]      | CYT              | ---                  | N                      | ---                         | N                       | ---                          | P                      | 1                         | POSITIVE          |
| RT0491    | rickettsial conserved hypothetical protein                       | 1            | NON-CYT             | N                        | ---                    | TMH              | ---                  | Y                      | YILI-QNGY [31-32]           | N                       | ---                          | NN                     | 1                         | POSITIVE          |
| RT0492    | rickettsial conserved hypothetical protein                       | 0            | NON-CYT             | Y                        | IASA-KDTN [26-27]      | CYT              | ---                  | Y                      | IASA-KDTN [26-27]           | Y                       | IASA-KDTN [26-27]            | P+NN+HMM               | 3                         | POSITIVE          |
| RT0546    | hypothetical protein RT0546                                      | 0            | NON-CYT             | Y                        | QVIA-TSFN [23-24]      | CYT              | ---                  | Y                      | QVIA-TSFN [23-24]           | N                       | ---                          | P+NN                   | 2                         | POSITIVE          |
| RT0547    | 3-hydroxyacyl-CoA dehydrogenase (FadB)                           | 0            | CYT                 | N                        | ---                    | CYT              | ---                  | Y                      | SSHR-VVLL [30-31]           | Y                       | ALIA-NSSH [25-26]            | NN+HMM                 | 1.1                       | not tested        |
| RT0548    | 2-octaprenyl-6-methoxyphenyl hydroxylase                         | 0            | NON-CYT             | Y                        | LSFA-QKGI [30-31]      | SpI              | LSFA-QKGI [30-31]    | Y                      | LSFA-QKGI [30-31]           | Y                       | LSFA-QKGI [30-31]            | All                    | 4                         | POSITIVE          |
| RT0551    | rickettsial conserved hypothetical protein                       | 0            | NON-CYT             | Y                        | NSCS-ESTR [22-23]      | SpII             | LLNS-CSES [20-21]    | N                      | ---                         | N                       | ---                          | P+L                    | 1.1                       | POSITIVE          |
| RT0554    | rickettsial conserved hypothetical protein                       | 5            | CYT                 | N                        | ---                    | TMH              | ---                  | N                      | ---                         | Y                       | MSYK-INIQ [37-38]            | HMM                    | 1                         | NEGATIVE          |
| RT0555    | cell division protein FtsI/ penicillin-binding protein (FtsI2)   | 1            | NON-CYT             | N                        | ---                    | CYT              | ---                  | N                      | ---                         | Y                       | STVS-YRLI [44-45]            | HMM                    | 1                         | not tested        |
| RT0561    | hypothetical protein RT0561                                      | 0            | NON-CYT             | Y                        | LSYA-DQTT [19-20]      | SpI              | LSYA-DQTT [19-20]    | Y                      | LSYA-DQTT [19-20]           | Y                       | LSYA-DQTT [19-20]            | All                    | 4                         | POSITIVE          |
| RT0563    | rickettsial conserved hypothetical protein                       | 0            | CYT                 | N                        | ---                    | CYT              | ---                  | Y                      | REQA-KEYL [20-21]           | N                       | ---                          | NN                     | 1                         | NEGATIVE          |

Table S1

| Locus Tag | Product Name                                                       | Phobius: TM? | Phobius: Prediction | Phobius: Signal Peptide? | Phobius: Cleavage Site | LipoP Prediction | LipoP: Cleavage Site | SignalP: NN Prediction | SignalP: Cleavage Site (NN) | SignalP: HMM Prediction | SignalP: Cleavage Site (HMM) | Prediction Concordance | Cleavage Site Concordance | PhoA Assay Result |
|-----------|--------------------------------------------------------------------|--------------|---------------------|--------------------------|------------------------|------------------|----------------------|------------------------|-----------------------------|-------------------------|------------------------------|------------------------|---------------------------|-------------------|
| RT0565    | protein export protein PrsA precursor                              | 0            | NON-CYT             | Y                        | IAFC-DQDK [24-25]      | SpII             | SIAF-CDQD [23-24]    | Y                      | IAFC-DQDK [24-25]           | Y                       | SSIA-FCDQ [22-23]            | All                    | 2.1.1                     | POSITIVE          |
| RT0576    | Sco2-like protein                                                  | 0            | NON-CYT             | Y                        | VLLS-LSTP [21-22]      | CYT              | ---                  | N                      | ---                         | Y                       | LSLS-TPKK [23-24]            | P+HMM                  | 1.1                       | not tested        |
| RT0577    | cytochrome c-type biogenesis protein CcmE                          | 1            | NON-CYT             | N                        | ---                    | CYT              | ---                  | N                      | ---                         | Y                       | ILYN-LEKN [29-30]            | HMM                    | 1                         | not tested        |
| RT0579    | MviN-like protein                                                  | 13           | CYT                 | Y                        | RIFG-LVRE [21-22]      | CYT              | ---                  | N                      | ---                         | N                       | ---                          | P                      | 1                         | not tested        |
| RT0582    | ATP-dependent DNA helicase RecG                                    | 0            | NON-CYT             | Y                        | PVKA-FINI [16-17]      | CYT              | ---                  | N                      | ---                         | N                       | ---                          | P                      | 1                         | not tested        |
| RT0584    | D-alanine ligase (MurF)                                            | 0            | NON-CYT             | Y                        | SVNC-NAVQ [22-23]      | CYT              | ---                  | N                      | ---                         | N                       | ---                          | P                      | 1                         | not tested        |
| RT0586    | Mfd transcription-repair coupling factor (superfamily helicase II) | 0            | CYT                 | N                        | ---                    | CYT              | ---                  | Y                      | PATA-KCFF [10-11]           | N                       | ---                          | NN                     | 1                         | not tested        |
| RT0591    | bicyclomycin resistance protein (Bcr1)                             | 11           | CYT                 | Y                        | TIYT-SGLP [27-28]      | TMH              | ---                  | Y                      | SPTT-ETIY [22-23]           | N                       | ---                          | P+NN                   | 1.1                       | not tested        |
| RT0596    | 50S ribosomal protein L35 (RpmI)                                   | 0            | CYT                 | N                        | ---                    | CYT              | ---                  | Y                      | KVIA-SQAG [24-25]           | N                       | ---                          | NN                     | 1                         | not tested        |
| RT0601    | hypothetical protein RT0601                                        | 1            | CYT                 | Y                        | TILA-IVLS [16-17]      | TMH              | ---                  | N                      | ---                         | N                       | ---                          | P                      | 1                         | POSITIVE          |
| RT0603    | nitrogen regulation protein NtrY                                   | 4            | NON-CYT             | N                        | ---                    | TMH              | ---                  | Y                      | IVSA-CTTF [32-33]           | Y                       | IVSA-CTTF [32-33]            | NN+HMM                 | 2                         | not tested        |
| RT0612    | zinc/manganese ABC transporter permease protein (ZnuB)             | 7            | CYT                 | Y                        | GCIA-LWKR [22-23]      | TMH              | ---                  | N                      | ---                         | Y                       | GCIA-LWKR [22-23]            | P+HMM                  | 2                         | not tested        |
| RT0619    | ribonuclease PH (Rph)                                              | 0            | CYT                 | N                        | ---                    | CYT              | ---                  | Y                      | LIHA-EGSC [24-25]           | N                       | ---                          | NN                     | 1                         | not tested        |
| RT0621    | possible permease                                                  | 7            | CYT                 | Y                        | SISS-FMLI [18-19]      | TMH              | ---                  | Y                      | SSFM-LIPD [20-21]           | N                       | ---                          | P+NN                   | 1.1                       | NEGATIVE          |
| RT0628    | 30S ribosomal protein S11 (RpsK)                                   | 0            | CYT                 | N                        | ---                    | CYT              | ---                  | Y                      | ASFN-NTIV [26-27]           | N                       | ---                          | NN                     | 1                         | not tested        |
| RT0629    | 30S ribosomal protein S13 (RpsM)                                   | 0            | NON-CYT             | Y                        | STMA-AEIC [30-31]      | CYT              | ---                  | N                      | ---                         | N                       | ---                          | P                      | 1                         | not tested        |
| RT0631    | preprotein translocase SecY                                        | 10           | CYT                 | N                        | ---                    | TMH              | ---                  | Y                      | PIPG-IDSI [37-38]           | N                       | ---                          | NN                     | 1                         | not tested        |
| RT0644    | 50S ribosomal protein L16 (RplP)                                   | 0            | NON-CYT             | Y                        | SIDG-WRVT [39-40]      | CYT              | ---                  | Y                      | KAKA-GMTL [23-24]           | N                       | ---                          | P+NN                   | 1.1                       | not tested        |
| RT0667    | rickettsial conserved hypothetical protein                         | 0            | NON-CYT             | Y                        | VAQA-SLTS [19-20]      | SpI              | VAQA-SLTS [19-20]    | Y                      | VAQA-SLTS [19-20]           | Y                       | VAQA-SLTS [19-20]            | All                    | 4                         | POSITIVE          |
| RT0668    | probable organic solvent tolerance protein OstA                    | 0            | NON-CYT             | Y                        | VSFT-QQFK [18-19]      | CYT              | ---                  | Y                      | VSFT-QQFK [18-19]           | Y                       | VSFT-QQFK [18-19]            | P+NN+HMM               | 3                         | not tested        |
| RT0680    | proline/betaine transporter ProP4                                  | 12           | CYT                 | N                        | ---                    | TMH              | ---                  | Y                      | PNHD-KVVA [42-43]           | N                       | ---                          | NN                     | 1                         | not tested        |
| RT0681    | 4-hydroxybenzoate octaprenyltransferase                            | 8            | CYT                 | N                        | ---                    | CYT              | ---                  | Y                      | ALFG-LLLA [32-33]           | Y                       | LLLA-NPAN [36-37]            | NN+HMM                 | 1.1                       | not tested        |
| RT0684    | DNA recombination protein RmuC                                     | 1            | CYT                 | N                        | ---                    | CYT              | ---                  | Y                      | FALI-ICFY [19-20]           | N                       | ---                          | NN                     | 1                         | not tested        |
| RT0691    | lipid A export ATP-binding/permease protein MsbA                   | 6            | CYT                 | N                        | ---                    | TMH              | ---                  | N                      | ---                         | Y                       | LLIG-SVFR [38-39]            | HMM                    | 1                         | not tested        |
| RT0692    | rickettsial conserved hypothetical protein                         | 0            | NON-CYT             | Y                        | PIFA-SSMQ [19-20]      | SpI              | PIFA-SSMQ [19-20]    | Y                      | PIFA-SSMQ [19-20]           | Y                       | PIFA-SSMQ [19-20]            | All                    | 4                         | POSITIVE          |
| RT0693    | bicyclomycin resistance protein (Bcr2)                             | 11           | CYT                 | Y                        | EILA-GSEI [14-15]      | CYT              | ---                  | N                      | ---                         | N                       | ---                          | P                      | 1                         | not tested        |



Table S1

| Locus Tag | Product Name                                                                        | Phobius: TM? | Phobius: Prediction | Phobius: Signal Peptide? | Phobius: Cleavage Site | LipoP Prediction | LipoP: Cleavage Site | SignalP: NN Prediction | SignalP: Cleavage Site (NN) | SignalP: HMM Prediction | SignalP: Cleavage Site (HMM) | Prediction Concordance | Cleavage Site Concordance | PhoA Assay Result |
|-----------|-------------------------------------------------------------------------------------|--------------|---------------------|--------------------------|------------------------|------------------|----------------------|------------------------|-----------------------------|-------------------------|------------------------------|------------------------|---------------------------|-------------------|
| RT0694    | hypothetical protein RT0694                                                         | 4            | CYT                 | N                        | ---                    | TMH              | ---                  | N                      | ---                         | Y                       | IGVA-ALIV [40-41]            | HMM                    | 1                         | POSITIVE          |
| RT0697    | hypothetical protein RT0697                                                         | 4            | NON-CYT             | N                        | ---                    | SpI              | ALFA-ATET [20-21]    | Y                      | ALFA-ATET [20-21]           | Y                       | ALFA-ATET [20-21]            | L+NN+HMM               | 3                         | POSITIVE          |
| RT0698    | cytochrome c-type biogenesis protein CcmF                                           | 15           | CYT                 | N                        | ---                    | TMH              | ---                  | Y                      | TLII-IPWI [23-24]           | N                       | ---                          | NN                     | 1                         | not tested        |
| RT0699    | rickettsial outer membrane protein B (rOmpB/Sca5)                                   | 0            | NON-CYT             | Y                        | VAMG-AVMQ [34-35]      | SpI              | VAMG-AVMQ [34-35]    | Y                      | VAMG-AVMQ [34-35]           | Y                       | VAMG-AVMQ [34-35]            | All                    | 4                         | POSITIVE          |
| RT0711    | conserved hypothetical protein / possible ABC transporter substrate binding protein | 1            | CYT                 | N                        | ---                    | TMH              | ---                  | Y                      | FAYK-TGTS [27-28]           | N                       | ---                          | NN                     | 1                         | POSITIVE          |
| RT0722    | acetyl-CoA acetyltransferase (FadA)                                                 | 0            | CYT                 | N                        | ---                    | SpI              | PMLA-AHLI [31-32]    | Y                      | PMLA-AHLI [31-32]           | Y                       | MLAA-HLIN [32-33]            | L+NN+HMM               | 2.1                       | not tested        |
| RT0733    | rickettsial conserved hypothetical protein                                          | 0            | NON-CYT             | Y                        | LASC-QIPK [23-24]      | SpII             | YLAS-CQIP [22-23]    | Y                      | LYLA-SCQI [21-22]           | Y                       | YLAS-CQIP [22-23]            | All                    | 2.1.1                     | POSITIVE          |
| RT0734    | twin arginine translocase protein A (TatA)                                          | 0            | NON-CYT             | Y                        | GAGK-LPQV [23-24]      | CYT              | ---                  | Y                      | VLFG-AGKL [20-21]           | N                       | ---                          | P+NN                   | 1.1                       | not tested        |
| RT0740    | proline/betaine transporter ProP5                                                   | 12           | CYT                 | N                        | ---                    | TMH              | ---                  | Y                      | ALIA-NKFF [35-36]           | N                       | ---                          | NN                     | 1                         | not tested        |
| RT0752    | guanylate kinase (Gmk)                                                              | 0            | NON-CYT             | Y                        | SSLA-KELL [24-25]      | SpI              | SSLA-KELL [24-25]    | N                      | ---                         | Y                       | SSLA-KELL [24-25]            | P+L+HMM                | 3                         | not tested        |
| RT0756    | hypothetical protein RT0756                                                         | 7            | CYT                 | N                        | ---                    | TMH              | ---                  | Y                      | ISNI-FDLL [35-36]           | N                       | ---                          | NN                     | 1                         | NEGATIVE          |
| RT0758    | peptidoglycan-associated lipoprotein precursor (Pal)                                | 0            | NON-CYT             | Y                        | GCNT-TKKT [20-21]      | SpII             | MLVG-CNTT [17-18]    | Y                      | TQMA-GMVN [28-29]           | Y                       | NNTK-KTTQ [22-23]            | All                    | 1.1.1.1                   | POSITIVE          |
| RT0760    | 50S ribosomal protein L32 (RpmF)                                                    | 0            | CYT                 | N                        | ---                    | CYT              | ---                  | Y                      | LALG-KVNV [23-24]           | N                       | ---                          | NN                     | 1                         | not tested        |
| RT0761    | hypothetical protein RT0761                                                         | 0            | NON-CYT             | Y                        | LNLC-KTIE [22-23]      | SpII             | ALNS-CKTI [21-22]    | Y                      | LAFP-ALNS [17-18]           | Y                       | NSCK-TIEN [23-24]            | All                    | 1.1.1.1                   | POSITIVE          |
| RT0763    | DNA polymerase I (PolA)                                                             | 0            | CYT                 | N                        | ---                    | CYT              | ---                  | Y                      | AYYA-QQSL [22-23]           | N                       | ---                          | NN                     | 1                         | not tested        |
| RT0767    | rickettsial conserved hypothetical protein                                          | 0            | NON-CYT             | Y                        | LSFA-ITLT [21-22]      | SpI              | TVYS-VNKG [28-29]    | Y                      | LSFA-ITLT [21-22]           | Y                       | LSFA-ITLT [21-22]            | All                    | 3.1                       | POSITIVE          |
| RT0768    | murein peptide permease protein AmpG                                                | 12           | CYT                 | N                        | ---                    | TMH              | ---                  | Y                      | LTFN-LIFF [22-23]           | Y                       | LTFN-LIFF [22-23]            | NN+HMM                 | 2                         | not tested        |
| RT0773    | rickettsial conserved hypothetical protein                                          | 0            | NON-CYT             | Y                        | NVYA-SIWD [20-21]      | SpI              | NVYA-SIWD [20-21]    | Y                      | NVYA-SIWD [20-21]           | Y                       | NVYA-SIWD [20-21]            | All                    | 4                         | POSITIVE          |
| RT0775    | rickettsial conserved hypothetical protein                                          | 0            | NON-CYT             | Y                        | ITFA-KEIG [21-22]      | CYT              | ---                  | N                      | ---                         | Y                       | ITFA-KEIG [21-22]            | P+HMM                  | 2                         | POSITIVE          |
| RT0794    | penicillin-binding protein 1A (MrcA)                                                | 1            | NON-CYT             | N                        | ---                    | TMH              | ---                  | Y                      | SVTA-YIIV [24-25]           | Y                       | SVTA-YIIV [24-25]            | NN+HMM                 | 2                         | not tested        |
| RT0797    | hypothetical protein RT0797                                                         | 0            | NON-CYT             | Y                        | TINA-MNNK [27-28]      | SpI              | TINA-MNNK [27-28]    | Y                      | TINA-MNNK [27-28]           | Y                       | TINA-MNNK [27-28]            | All                    | 4                         | POSITIVE          |
| RT0807    | rickettsial conserved hypothetical protein (phospholipase D, Pld)                   | 0            | NON-CYT             | Y                        | TALG-IYVE [22-23]      | TMH              | ---                  | Y                      | TALG-IYVE [22-23]           | Y                       | GIYV-ESTY [25-26]            | P+NN+HMM               | 2.1                       | POSITIVE          |
| RT0810    | rickettsial conserved hypothetical protein                                          | 1            | NON-CYT             | N                        | ---                    | CYT              | ---                  | Y                      | IATA-FVGF [24-25]           | N                       | ---                          | NN                     | 1                         | POSITIVE          |
| RT0815    | possible outer surface protein                                                      | 0            | NON-CYT             | Y                        | ISFA-DCDI [22-23]      | SpI              | ISFA-DCDI [22-23]    | Y                      | ISFA-DCDI [22-23]           | Y                       | ISFA-DCDI [22-23]            | All                    | 4                         | POSITIVE          |
| RT0816    | possible outer surface protein                                                      | 0            | NON-CYT             | Y                        | ISFA-ECMD [22-23]      | SpI              | ISFA-ECMD [22-23]    | Y                      | ISFA-ECMD [22-23]           | Y                       | ISFA-ECMD [22-23]            | All                    | 4                         | POSITIVE          |
| RT0818    | heme exporter protein C (CcmC)                                                      | 6            | CYT                 | N                        | ---                    | TMH              | ---                  | Y                      | LYLA-LIVS [36-37]           | Y                       | LYLA-LIVS [36-37]            | NN+HMM                 | 2                         | not tested        |

Table S1

| Locus Tag | Product Name                                                    | Phobius: TM? | Phobius: Prediction | Phobius: Signal Peptide? | Phobius: Cleavage Site | LipoP Prediction | LipoP: Cleavage Site | SignalP: NN Prediction | SignalP: Cleavage Site (NN) | SignalP: HMM Prediction | SignalP: Cleavage Site (HMM) | Prediction Concordance | Cleavage Site Concordance | PhoA Assay Result |
|-----------|-----------------------------------------------------------------|--------------|---------------------|--------------------------|------------------------|------------------|----------------------|------------------------|-----------------------------|-------------------------|------------------------------|------------------------|---------------------------|-------------------|
| RT0821    | rickettsial 17 kDa surface antigen precursor                    | 0            | NON-CYT             | Y                        | MLQA-CNGP [19-20]      | SpII             | MLQA-CNGP [19-20]    | Y                      | MLQA-CNGP [19-20]           | Y                       | MLQA-CNGP [19-20]            | All                    | 4                         | POSITIVE          |
| RT0825    | hypothetical protein RT0825                                     | 0            | NON-CYT             | Y                        | CSTT-HDVA [18-19]      | SpI              | TTHD-VANR [20-21]    | Y                      | HDVA-NRIK [22-23]           | Y                       | HDVA-NRIK [22-23]            | All                    | 2.1.1                     | POSITIVE          |
| RT0853    | hypothetical protein RT0853                                     | 0            | NON-CYT             | Y                        | SIKA-YSNN [19-20]      | SpI              | KAYS-NNNI [21-22]    | Y                      | KAYS-NNNI [21-22]           | Y                       | KAYS-NNNI [21-22]            | All                    | 3.1                       | NEGATIVE          |
| RT0858    | hypothetical protein RT0858                                     | 3            | CYT                 | N                        | ---                    | TMH              | ---                  | N                      | ---                         | Y                       | VLYK-CINQ [24-25]            | HMM                    | 1                         | POSITIVE          |
| RT0860    | phosphonate metabolism protein PhnP                             | 0            | NON-CYT             | Y                        | PVIG-CECS [19-20]      | CYT              | ---                  | N                      | ---                         | N                       | ---                          | P                      | 1                         | not tested        |
| RT0862    | conserved hypothetical protein (possible transmembrane protein) | 6            | CYT                 | N                        | ---                    | TMH              | ---                  | N                      | ---                         | Y                       | TSIV-WITQ [27-28]            | HMM                    | 1                         | NEGATIVE          |
| RT0866    | hypothetical protein RT0866                                     | 1            | NON-CYT             | N                        | ---                    | TMH              | ---                  | Y                      | TLWV-GGFC [17-18]           | N                       | ---                          | NN                     | 1                         | NEGATIVE          |
| RT0869    | 30S ribosomal protein S16 (RpsP)                                | 0            | CYT                 | N                        | ---                    | CYT              | ---                  | Y                      | VVIA-NATA [23-24]           | N                       | ---                          | NN                     | 1                         | not tested        |
| RT0870    | 50S ribosomal protein L33 (RpmG)                                | 0            | CYT                 | N                        | ---                    | CYT              | ---                  | Y                      | VSTA-GTGV [16-17]           | N                       | ---                          | NN                     | 1                         | not tested        |

Table S2

| Target Signal Sequence | Forward Primer ID | Forward Primer Sequence (5' → 3')                      | Reverse Primer ID | Reverse Primer Sequence (5' → 3')                      | Annealing Temp. (°C) |
|------------------------|-------------------|--------------------------------------------------------|-------------------|--------------------------------------------------------|----------------------|
| RT_0011 <sup>+</sup>   | AZ4554            | TAT ATG <b>AGC</b> TCT ATG GAT GC                      | AZ4555            | CTT <b>CAA</b> <b>TTG</b> AGA ACG AAT AGC              | 43                   |
| RT_0013                | AZ4552            | CCT AGT AAA TCC <b>GAG</b> <b>CTC</b> TTG GAG          | AZ4553            | GCT AAT ATG CTG <b>CCA</b> <b>ATT</b> GGT G            | 48                   |
| RT_0015 <sup>++</sup>  | AZ4383            | ATT GTA <b>TGA</b> <b>GCT</b> <b>CCA</b> TCA AAA G     | AZ4178            | GCC CAT <b>AGC</b> <b>AAT</b> <b>TGC</b> TTC AAC       | 46                   |
| RT_0028                | AZ4550            | CGC GTA ATA <b>GCG</b> <b>AGC</b> <b>TCA</b> AAT G     | AZ4551            | TGG TGC <b>CAA</b> <b>TTG</b> ATC ACC TTC ATG          | 48                   |
| RT_0029                | AZ4548            | CCG GAA TTA <b>CGA</b> <b>GCT</b> <b>CGA</b> TGA C     | AZ4549            | GTC CCT GCT TTA GAT <b>CAA</b> <b>TTG</b> ATT CC       | 48                   |
| RT_0030                | AZ4546            | GCG TAA GAT <b>GGA</b> <b>GCT</b> <b>CAA</b> CAA GG    | AZ4547            | GGG TTA TAC <b>AAT</b> <b>TGG</b> TTA TTG AAT CCG C    | 48                   |
| RT_0039 <sup>†</sup>   | AZ4713            | ACT ACT <b>GGA</b> <b>GCT</b> <b>CTA</b> GAG G         | AZ4714            | CCC <b>AAT</b> <b>TGA</b> GTA CCG ATA AC               | 45                   |
| RT_0043                | AZ4544            | ATT GCA TCG <b>AGC</b> <b>TCG</b> TGA AGC              | AZ4545            | GGT TCT GAG ACA <b>TCA</b> <b>ATT</b> <b>GAC</b> GTG C | 48                   |
| RT_0044                | AZ4542            | TTT ACT ATA <b>TTG</b> <b>AGC</b> <b>TCA</b> GAC G     | AZ4543            | TTA AAA <b>GCA</b> <b>ATT</b> <b>GCT</b> TTA CGG       | 43                   |
| RT_0047                | AZ4619            | GCT GTG TTA <b>GAG</b> <b>CTC</b> TGG C                | AZ4620            | CTT AAG GCA AGC <b>CAA</b> <b>TTG</b> TGC C            | 46                   |
| RT_0052                | AZ4812            | ATT <b>GAG</b> <b>CTC</b> CAG TAA TGA CTA TAA CAG      | AZ4188            | AAG TTA <b>TTG</b> <b>GAT</b> <b>CCT</b> TCT ATT GG    | 46                   |
| RT_0056 <sup>†</sup>   | AZ4715            | <b>AGA</b> <b>GCT</b> <b>CCT</b> AAT TAA TGA ATG ATG C | AZ4716            | CTA TGC <b>AAT</b> <b>TGA</b> ACA AGA ACC GG           | 46                   |
| RT_0057                | AZ4997            | GCA AGT AAG <b>AGC</b> <b>TCA</b> TCA TTA ATA TG       | AZ4998            | <b>GGA</b> <b>TCC</b> ATG TGT TGG CAA TCC              | 46                   |
| RT_0064                | AZ4538            | GTA <b>CAG</b> <b>AGC</b> <b>TCA</b> TAA TAC AAC GC    | AZ4539            | TTA <b>AAG</b> <b>GAT</b> <b>CCT</b> GTT TAA TAT AAC C | 46                   |
| RT_0080 <sup>†</sup>   | AZ4536            | GAA TAA GGC <b>TTG</b> <b>AGC</b> <b>TCT</b> ATA TGC   | AZ4537            | CTT CGG GTT <b>CAA</b> <b>TTG</b> TAC CTG              | 46                   |
| RT_0083 <sup>++</sup>  | AZ4717            | TAA TGA <b>GAG</b> <b>CTC</b> AAA TAT GC               | AZ4718            | TCA <b>GGA</b> <b>TCC</b> TCG TAA TGA TG               | 45                   |
| RT_0103 <sup>†</sup>   | AZ4556            | TTA <b>TTG</b> <b>AGC</b> <b>TCA</b> AAT TGA TAC ACT C | AZ4557            | TGC AAT ACT <b>CAA</b> <b>TTG</b> GCT GTG              | 46                   |
| RT_0136                | AZ4663            | CAT AAT CCT <b>GAG</b> <b>CTC</b> GCT TAT G            | AZ4664            | GCA GAT TCA <b>ATT</b> <b>GTC</b> CGA AGC              | 48                   |
| RT_0150                | AZ4558            | CGA GAG <b>GAG</b> <b>CTC</b> GCA TTA TGA C            | AZ4559            | CTT TAG AAC <b>AAT</b> <b>TGT</b> AAG TTT CGC C        | 48                   |
| RT_0174                | AZ4560            | GAA TCC <b>TTG</b> <b>AGC</b> <b>TCT</b> TGT AAG CC    | AZ4561            | TTT <b>CCC</b> <b>AAT</b> <b>TGT</b> TCC GCT GC        | 48                   |
| RT_0178 <sup>†</sup>   | AZ4665            | TCA CAA <b>GAG</b> <b>CTC</b> AAT TAA CTG              | AZ4666            | GCC TTT <b>GGA</b> <b>TCC</b> TGA GG                   | 45                   |
| RT_0182                | AZ4667            | TTG <b>CCG</b> <b>AGC</b> <b>TCC</b> TTC AAT TTC       | AZ4668            | GTC <b>CAA</b> <b>TTG</b> CTG ATA CCA TAA ATG C        | 46                   |
| RT_0187                | AZ4562            | ATT <b>AGA</b> <b>GCT</b> <b>CAC</b> ACT TGG TG        | AZ4563            | CTA <b>CCA</b> <b>ATT</b> <b>GTT</b> ATT ACA ACC       | 43                   |
| RT_0188 <sup>†</sup>   | AZ4563            | TGG <b>ATG</b> <b>AGC</b> <b>TCA</b> AAG TGC G         | AZ4565            | TAC TTT <b>AGG</b> <b>ATC</b> <b>CGT</b> TAT GTG G     | 48                   |
| RT_0199                | AZ5256            | <b>GGA</b> <b>GCT</b> <b>CGT</b> TGT TAG TAA AC        | AZ5458            | <b>AAG</b> <b>GAT</b> <b>CCT</b> TAT TAA ATT TAT C     | 46                   |
| RT_0216                | AZ4566            | ATT <b>ACG</b> <b>AGC</b> <b>TCA</b> CAT TGC TAC       | AZ4567            | GAG GCA ACT GTT <b>CAA</b> <b>TTG</b> CG               | 48                   |
| RT_0218                | AZ4568            | ATT <b>GCG</b> <b>AGC</b> <b>TCC</b> CTT AAA TG        | AZ4569            | AGT ACT <b>AGG</b> <b>ATC</b> <b>CTT</b> ATC TTC C     | 48                   |
| RT_0222 <sup>***</sup> | AZ4669            | GTT CAT GAC <b>GAG</b> <b>CTC</b> TTC CAG              | AZ4670            | <b>TCA</b> <b>ATT</b> <b>GCT</b> GCT TTA GCA GAT C     | 48                   |
| RT_0224 <sup>†</sup>   | AZ4671            | GAT <b>CGA</b> <b>GCT</b> <b>CAA</b> GCA TTG C         | AZ4672            | CAT <b>TCA</b> <b>ATT</b> <b>GAT</b> ATA CCT TTG C     | 46                   |
| RT_0247                | AZ4673            | TAC CAT <b>GGA</b> <b>GCT</b> <b>CTG</b> TTT AGC       | AZ4674            | AGC CTG CTA <b>CAA</b> <b>TTG</b> AAC C                | 45                   |
| RT_0258                | AZ4675            | TGA <b>CTG</b> <b>AGC</b> <b>TCT</b> CTT AAG ATG       | AZ4676            | CTT <b>CGG</b> <b>CAA</b> <b>TTG</b> CAA CAT C         | 45                   |
| RT_0260                | AZ5294            | TTT <b>GAG</b> <b>CTC</b> ATA TAT GTG GCG TG           | AZ5295            | CTT TGT GAT AAT <b>GGA</b> <b>TCC</b> TCC G            | 46                   |
| RT_0263                | AZ4570            | GTG TAG GAA <b>GAG</b> <b>CTC</b> ATC TAA AG           | AZ4571            | AGA <b>TCA</b> <b>ATT</b> <b>GAA</b> CTA TGG C         | 43                   |
| RT_0276 <sup>†</sup>   | AZ4677            | <b>CGA</b> <b>GCT</b> <b>CGC</b> AAT ATC GG            | AZ4678            | AAG TAT <b>GGA</b> <b>TCC</b> CAT CTT G                | 45                   |
| RT_0279                | AZ4572            | GTA <b>AGG</b> <b>AGC</b> <b>TCT</b> TAA AAT AGT CAC   | AZ4573            | CTG ATA CAA <b>GGA</b> <b>TCC</b> ACG C                | 43                   |
| RT_0281                | AZ4574            | TTC <b>AGA</b> <b>GCT</b> <b>CGA</b> CAT AAA TCC CG    | AZ4575            | GGA TTA TAT ATA <b>CAA</b> <b>TTG</b> CTG ATC C        | 48                   |
| RT_0286 <sup>++</sup>  | AZ4679            | <b>AAG</b> <b>AGC</b> <b>TCA</b> TGT ACT ATG TGG       | AZ4680            | ACT TAT CTA <b>GGA</b> <b>TCC</b> TTA CTA C            | 45                   |
| RT_0287 <sup>†</sup>   | AZ4860            | AAG TAA <b>GAG</b> <b>CTC</b> TTA TGA AAC GC           | AZ4861            | AAG <b>CAG</b> <b>GAT</b> <b>CCT</b> GAT ATC G         | 46                   |
| RT_0291 <sup>†</sup>   | AZ4681            | ACG <b>GAG</b> <b>CTC</b> TTC TAA GAG TTG              | AZ4682            | GAA CTA <b>CAA</b> <b>TTG</b> CCG GAT CG               | 48                   |
| RT_0301 <sup>†</sup>   | AZ4683            | CAT TCT <b>GGA</b> <b>GCT</b> <b>CTT</b> TCT CGT G     | AZ4684            | TTG <b>ATG</b> <b>GAT</b> <b>CCC</b> TCA GAG G         | 46                   |
| RT_0312                | AZ4621            | GTG <b>AGC</b> <b>TCT</b> TGA TCA ATA TTG CC           | AZ5108            | GAA <b>TCA</b> <b>ATT</b> <b>GTA</b> CCG ATT ACC       | 43                   |
| RT_0319                | AZ4685            | CAC TAG <b>GAG</b> <b>CTC</b> AAG ATG CGT G            | AZ4686            | GTA TGT <b>TTG</b> <b>GAT</b> <b>CCG</b> ACT CTT TG    | 46                   |
| RT_0331                | AZ4578            | GAT GAG <b>GAG</b> <b>CTC</b> AAA AAG CAT AC           | AZ4579            | TTA GCA TTA <b>CAA</b> <b>TTG</b> CGG C                | 48                   |
| RT_0338 <sup>†</sup>   | AZ4623            | TAG <b>AGC</b> <b>TCT</b> TTA CAG ACA TG               | AZ4624            | <b>CTG</b> <b>GAT</b> <b>CCA</b> ACT TTC CAT CTT C     | 43                   |
| RT_0341 <sup>†</sup>   | AZ4983            | GGG <b>AGC</b> <b>TCG</b> TGT TAA CGC ACC TG           | AZ4984            | GCC TTC <b>AAT</b> <b>TGT</b> GCC ATG TG               | 43                   |
| RT_0347                | AZ4689            | GAT GAA <b>GAG</b> <b>CTC</b> AGC CTA CTC              | AZ4690            | CAA AGC <b>CAA</b> <b>TTG</b> GTG GAT AC               | 48                   |
| RT_0348 <sup>†</sup>   | AZ4691            | TGT <b>TGA</b> <b>GCT</b> <b>CCG</b> GTA TGG C         | AZ4692            | CGT <b>TGG</b> <b>GAT</b> <b>CCT</b> TCT TAA ATT CAG C | 45                   |
| RT_0355 <sup>†</sup>   | AZ4580            | GAT TTG <b>TGA</b> <b>GCT</b> <b>CTG</b> CTA TAT G     | AZ4590            | TTG CTT AAC <b>AAT</b> <b>TGC</b> AAG C                | 46                   |
| RT_0358                | AZ4625            | TGA <b>GAG</b> <b>CTC</b> GAG AAA CCA TAC C            | AZ4626            | TTG TCT GAC <b>AAT</b> <b>TGA</b> AGC AG               | 43                   |
| RT_0377                | AZ4591            | GTT <b>GAG</b> <b>CTC</b> TTC GCA ACA ATA C            | AZ4592            | GCA GGA <b>TCA</b> <b>ATT</b> <b>GGA</b> ACT TGG GC    | 46                   |
| RT_0379                | AZ4593            | GCT AAG <b>AGC</b> <b>TCA</b> ATA AAA TCT ATA CC       | AZ4594            | CTT CAA CAT <b>CAA</b> <b>TTG</b> TAG CAC C            | 46                   |
| RT_0382 <sup>†</sup>   | AZ4627            | ATT <b>GAG</b> <b>CTC</b> GGG GTT TAG TAT G            | AZ4628            | TTG <b>GCA</b> <b>ATT</b> <b>GAA</b> CTA TAT CTG G     | 43                   |
| RT_0383                | AZ4693            | CTA TCT TTA TAG <b>AGC</b> <b>TCT</b> GCA TC           | AZ4694            | CTG TAC GTT <b>CAA</b> <b>TTG</b> GAT TAC C            | 45                   |
| RT_0388                | AZ4595            | TGT ATC CAC <b>GGA</b> <b>GCT</b> <b>CAT</b> CAT C     | AZ4596            | ATC TAC <b>AAT</b> <b>TGC</b> TTG TGA CAA TAC          | 46                   |
| RT_0390                | AZ4597            | GAT CAG TCA <b>TGA</b> <b>GCT</b> <b>CGC</b> ACA G     | AZ4598            | CTT TCA TAA AAC <b>AAT</b> <b>TGG</b> TAG G            | 43                   |
| RT_0393                | AZ4629            | CTT <b>CGG</b> <b>AGC</b> <b>TCT</b> TTT AAT G         | AZ4630            | CTT CTT CAC <b>AAT</b> <b>TGT</b> CCG G                | 43                   |
| RT_0395 <sup>†</sup>   | AZ4985            | CGT AAC ACT <b>GAG</b> <b>CTC</b> GTC AG               | AZ4600            | CTA TTA AGC <b>AAT</b> <b>TGT</b> GAG GCG GTG          | 48                   |
| RT_0399                | AZ4601            | ATT <b>GAG</b> <b>CTC</b> ATA GCA CTT TAG TGC          | AZ4602            | TTT <b>CAA</b> <b>TTG</b> CCA CCT TTA GCA CC           | 43                   |
| RT_0406                | AZ4603            | TAT <b>GAG</b> <b>CTC</b> CAT CAA GCA CTC              | AZ4604            | TTT ATC <b>AAT</b> <b>TGT</b> ACC TCC TAC AGC          | 45                   |
| RT_0417                | AZ4695            | GGT <b>AGA</b> <b>GCT</b> <b>CAG</b> CAC AGT GC        | AZ4696            | <b>CAA</b> <b>TTG</b> TTG CCT CTT CAC                  | 45                   |

<sup>†</sup> Primers generated multiple amplicons

<sup>\*</sup> A 1:100 dilution of the original PCR product was used as template for a second PCR with same primers

<sup>+</sup> Amplicon cloned into pCR4-TOPO

Table S2

| Target Signal Sequence | Forward Primer ID | Forward Primer Sequence (5' → 3')   | Reverse Primer ID | Reverse Primer Sequence (5' → 3')     | Annealing Temp. (°C) |
|------------------------|-------------------|-------------------------------------|-------------------|---------------------------------------|----------------------|
| RT_0432 <sup>†</sup>   | AZ4856            | AAG TCT TGA GCT CGG TCA C           | AZ4657            | CAG GAT CCT TTT CAA CGT C             | 46                   |
| RT_0438 <sup>†</sup>   | AZ4185            | AAT CTT GGA TCC TTA CTC ACT AAC     | AZ4186            | CCA TTT TGG GAT CCT CCT CC            | 46                   |
| RT_0444 <sup>†</sup>   | AZ4631            | CCT CAT AAG ATG AGC TCT GAT AAG     | AZ4632            | CCT GAT TCA ATT GAC GCG               | 45                   |
| RT_0445 <sup>†</sup>   | AZ4854            | TAG CGA GCT CTA TGG AAC             | AZ4698            | GCA GTA CAA TTG CTC CAA G             | 43                   |
| RT_0459                | AZ4699            | TCT TCT GCG ATT AGA GCT CAA GAA C   | AZ4700            | GTA TTG GAT CCG GTA AAT CG            | 45                   |
| RT_0465 <sup>†</sup>   | AZ4701            | GTG GAT AAT GAG CTC CTA CAT TG      | AZ4702            | CGA GCA ATT GCT GAT GAA G             | 45                   |
| RT_0475                | AZ4719            | GCA AAA TAG CAT GAG CTC ACA G       | AZ4720            | AAG CTA CTA TGC AAT TGA ATA TC        | 45                   |
| RT_0491                | AZ4721            | TCA TGA GCT CCT CAG AAT GGG         | AZ4722            | CGC ATT TCA ATT GTT ATT GAC TCC       | 45                   |
| RT_0492                | AZ4723            | CAA GAG CTC TTC AAT TAC TTC GG      | AZ4724            | GCA ATT GAA GTA TCG CAT TAT CG        | 46                   |
| RT_0546 <sup>†</sup>   | AZ4987            | GAG CTC ATA ATT GAA TTG ATC         | AZ4726            | CTC AAT TGG AGG CTT TGC ACA CC        | 46                   |
| RT_0548 <sup>††</sup>  | AZ4993            | AAG TTT GAG CTC AAC AAA TGG         | AZ4608            | TTT ACA ATT GGG CGT TAA AG            | 48                   |
| RT_0551                | AZ4727            | AGC CTA CAT AGA GCT CCA AC          | AZ4728            | CCA AAC AAT TGT TTC AGG TTC AC        | 48                   |
| RT_0554 <sup>†</sup>   | AZ4633            | TTG ATA GAG CTC AGT ACA TTA G       | AZ4634            | AGA CAA TTG AGG GAA TAT AAC G         | 46                   |
| RT_0561 <sup>†</sup>   | AZ4609            | CTT ATA AGG AGC TCT TAT GC          | AZ4610            | GCT TGC ACA ATT GTT GTA G             | 46                   |
| RT_0563 <sup>†</sup>   | AZ4989            | CAG AGC TCA TAG TGT ATA TGT C       | AZ4730            | CTT CCT ACA ACT GGA TCC CC            | 48                   |
| RT_0565 <sup>†</sup>   | AZ5152            | TTT GAG CTC ATG TTT AAC ACA ATG     | AZ5004            | CCG GAT CCT GTA GTG GAA AAT C         | 46                   |
| RT_0601 <sup>††</sup>  | AZ4731            | TAG AGC TCA ATA TAT GCA TTA C       | AZ4732            | AAC CAA CCA CAA TTG CCA TG            | 48                   |
| RT_0621 <sup>†</sup>   | AZ4733            | CAA GGA GCT CGC ATG CCT TG          | AZ4734            | CAG ATC AAT TGT GCT TGA TGC           | 46                   |
| RT_0667                | AZ4613            | TTT GAG CTC GAT TGT TTC G           | AZ4614            | AGT TGC TTA TCT GGA TCC GAA G         | 46                   |
| RT_0692                | AZ4615            | GCT TGA GAG CTC CTA TAG C           | AZ4616            | CTT AAC CAA TTG TAC TGA CTT GC        | 46                   |
| RT_0694 <sup>†</sup>   | AZ4635            | ACC ATT GTA GAG CTC AAA TG          | AZ4636            | ATA TCC CCA ATT GAC CCG               | 45                   |
| RT_0697                | AZ4637            | ATG TAA GTA CCG GAG CTC TTA TAG G   | AZ4638            | AGC ACG CCA ATT GCC AGT G             | 43                   |
| RT_0699                | AZ5732            | ACT GAG CTC TGG GAA AAA ATT ATG GC  | AZ5733            | GCA TTT GTT GTT CAA TTG TAT TGC       | 48                   |
| RT_0711                | AZ4735            | CGC CGA GCT CGT ACG CTT G           | AZ4736            | TTC GGG ATC CTA CCG ACT TTG           | 48                   |
| RT_0733                | AZ4852            | CTT CAG AGC TCC CTA TTG GTG TTG     | AZ4853            | CCA TCA GGA TCC TGA TTT GGC           | 46                   |
| RT_0756                | AZ4737            | CCT ACG AGC TCC ACC ACA C           | AZ4738            | TAA CGA AGA CAA TTG AGT GAG           | 45                   |
| RT_0758 <sup>†</sup>   | AZ4641            | ATC TCA AGG AGC TCA ATT ATG         | AZ4642            | CTA TCA AAA GGG ATC CAT ACA G         | 46                   |
| RT_0761 <sup>†</sup>   | AZ4643            | GGA GCT CCC ATT ATT AGC CTC GC      | AZ4644            | CCG GAT CCA TAG TAG GTG TAC C         | 46                   |
| RT_0767                | AZ4645            | TGG AGC TCT ATC TGA GTA TAG AAA GC  | AZ4646            | GGA AAT GTA CCC AAT TGA TAA TCG G     | 46                   |
| RT_0773                | AZ4647            | CAA CGA GCT CCA AGA ATA CTC AAA GTG | AZ4648            | CAT AAT GTG CCT GGT TCA ATT GGT CCT C | 48                   |
| RT_0775 <sup>†</sup>   | AZ4739            | CTA TTG AGC TCA ATT GCT TCC         | AZ4740            | TTC CCG CTA TAC ACA ATT GAT TG        | 46                   |
| RT_0797                | AZ4649            | TAG TGA GCT CGA AAT TAA TAG G       | AZ4650            | AAC CAA TTG TAC AGC AGA C             | 46                   |
| RT_0807 <sup>†</sup>   | AZ4151            | GAT GCA ATT GAA ATA GCT CC          | AZ4152            | GCA TAT CAA TTG ATT CTT CAG C         | 46                   |
| RT_0810 <sup>††</sup>  | AZ4741            | TGA TCG AGC TCC GTG GTG AC          | AZ4742            | CTC TAA GGA TCC TGC TCG C             | 46                   |
| RT_0815 <sup>†</sup>   | AZ4651            | GAT AGA GCT CTT ATC TAA TCT CG      | AZ4652            | TAC CAC TCA ATT GCT ATA GAT G         | 45                   |
| RT_0816 <sup>††</sup>  | AZ4653            | TTG AGC TCA TCA TCA TG              | AZ4654            | CCT AAA TCA ATT GGC ATA G             | 45                   |
| RT_0821 <sup>†</sup>   | AZ5005            | AAT TCA ATG AGC TCT ATA CTT TAC     | AZ5006            | ACC AAT TGG TCC ACC AAG AAC           | 46                   |
| RT_0825                | AZ4657            | ATA CTG AGC TCG CTT AGT C           | AZ4658            | TAC AAT TGG TAG ATG ATT AGC AG        | 45                   |
| RT_0853                | AZ4659            | GTA ATC GAG CTC CTT CAG GTG         | AZ4660            | ACC GTA AGG ATC CTC TTG AG            | 45                   |
| RT_0858                | AZ4661            | ATG TGC TAG AGC TCT TAT CTG         | AZ4662            | CCC ACA TTG CCA ATT GG                | 45                   |
| RT_0862 <sup>†</sup>   | AZ4743            | CGA GCT CAG GGC TGG AAT G           | AZ4744            | TAA CTG CAA TTG CTG GTA ACA G         | 46                   |
| RT_0866 <sup>††</sup>  | AZ4850            | CGG ATT TAT GTG AGC TCA ATG GG      | AZ4851            | CAA TTC AAT TGC CTC CGC CTG C         | 46                   |

<sup>†</sup> Primers generated multiple amplicons

<sup>\*</sup> A 1:100 dilution of the original PCR product was used as template for a second PCR with same primers

<sup>††</sup> Amplicon cloned into pCR4-TOPO

Table S3

| Target Gene Locus Tag | Forward Primer ID | Forward Primer Sequence (5' → 3')   | Reverse Primer ID | Reverse Primer Sequence (5' → 3')  | Annealing Temp. (°C) | Amplicon Size |
|-----------------------|-------------------|-------------------------------------|-------------------|------------------------------------|----------------------|---------------|
| RT_0013               | AZ5534            | GCA GTA AAT AAT GAG TGT CC          | AZ5535            | TTT CTT GGT AAA ACC GTC            | 60                   | 117           |
| RT_0015               | AZ4885            | CAA CGA TTC CTC TGA TGC C           | AZ4886            | GAT GAT TTG ATG CTT ACC GTA TC     | 55                   | 124           |
| RT_0028               | AZ4887            | TGG TGT GGG GCT TTA TTT TC          | AZ4888            | CCT GCT TTC AAG AGT TGT CCT G      | 60                   | 168           |
| RT_0029               | AZ4889            | AAA TGC TTC AAT GGT CCC AG          | AZ4890            | CCT TCC TCT TTC TTC GTT ACA TC     | 55                   | 141           |
| RT_0030               | AZ4891            | TTA CAA GTG GTC GGT CAA GTT AG      | AZ4891            | GAA ACG GGT GGG CTA TTT G          | 60                   | 158           |
| RT_0043               | AZ5466            | GCA CGA TTA CAT TAC TAA C           | AZ5467            | GTT CTT ATT CCA TTT CTT CC         | 55                   | 162           |
| RT_0044               | AZ4895            | ATA AAA AGC GTG TGG CGG             | AZ4896            | TAA GAC TAA ATA AGG ACC TGG AGC    | 55                   | 153           |
| RT_0052               | AZ5540            | CGT CTT TTA TCA TTA GAG CAA C       | AZ5541            | CAG TTT GAC CAT AGG ACC C          | 55                   | 130           |
| RT_0056               | AZ5176            | TTG GCA AAG ATG GGT AGT GAC TG      | AZ5177            | CAA GCA TAG CAA ATG AAA TAG CAG C  | 55                   | 128           |
| RT_0057               | AZ5178            | TGA TTC CTG CGA CAC TTA CCG         | AZ5179            | TCC TAC TGC GTT GTA TCC GTT TC     | 55                   | 143           |
| RT_0064               | AZ4899            | AAA GGT TTT CAA GCA GGT ATC TC      | AZ5900            | GCA CTT ATC CCG TTT CTT CC         | 55                   | 110           |
| RT_0080               | AZ5380            | GAT GAT TTT TCT GCT TAC GC          | AZ5381            | GAT GAT TTT CTG TCA AGA GTT TAG G  | 55                   | 202           |
| RT_0103               | AZ4901            | GGC ACT CCT TCT TTC TTT GTG         | AZ4902            | CAT TTG CTT TTT GTC TCA TCC TC     | 55                   | 107           |
| RT_0119 (rpsL)        | AZ4923            | CTC CTG CCT TAG AAT CCA ACC C       | AZ4924            | TTC CTT TAC ACT ATG CTT TTC ACC AG | 55                   | 167           |
| RT_0136               | AZ4903            | GGT CTT ATT ATT GCT TCA TTA GTC AAC | AZ4904            | AAT CTT TGG CGT GTC CCA AG         | 55                   | 120           |
| RT_0150               | AZ5544            | CAA TGT CTG GTG AAT CTT TG          | AZ5545            | AGG TAT GAC TTT AGT GA AAA AC      | 55                   | 104           |
| RT_0174               | AZ4907            | CCG ATA GCA GCG ATA AAT AG          | AZ4908            | ATC AGG ATA GTT GTA ACC TAA AAC    | 55                   | 162           |
| RT_0178               | AZ5653            | ACC TCA GAA AGC AAA GGC             | AZ5654            | GCT AAA TCT ATT CCT GTT CC         | 55                   | 249           |
| RT_0188               | AZ5190            | TGC TTT TTG TGT TTT TAG CC          | AZ5191            | ATC TGT TAT GTG GAT TTT CC         | 55                   | 170           |
| RT_0216               | AZ5192            | CGT GAT ACA GAT AGC ACC CAA GG      | AZ5193            | GAC CGT GAC GCT CTA AAT CCT G      | 55                   | 113           |
| RT_0218               | AZ5194            | TCT ATT ATT GGT GAC AGG GC          | AZ5195            | CAT CCT TAT CTT CCT TAT CTG G      | 55                   | 101           |
| RT_0222               | AZ5196            | GTA ATG CGT ATT TTT GGT ATG C       | AZ5197            | TCA CCT AAG GAC AGT GCT AAC        | 55                   | 148           |
| RT_0224               | AZ5504            | CAA AAA CGG TGA AGT AAG ATG         | AZ5505            | AAC AGG GGC ACA TAA AAT AC         | 55                   | 100           |
| RT_0247               | AZ5548            | ATA GGT TCA ATA ATA GCA G           | AZ5549            | TAA GTT TCC ACA CGC CC             | 55                   | 276           |
| RT_0260               | AZ5655            | TAT TTT GGT CGT GAA ACG             | AZ5656            | TCA TCT TCT AAC ACT TTT GC         | 55                   | 179           |
| RT_0263               | AZ5550            | GCA AAT ACA GAG GCA TTA CAT C       | AZ5551            | GGC AAA CAC TAC ACA CTT C          | 55                   | 124           |
| RT_0279               | AZ5204            | AAA GTC CGT GCG TTT CTG C           | AZ5205            | TAA TAG GTC TTC TGA TAC AAG G      | 55                   | 75            |
| RT_0281               | AZ5554            | GGT TTT ACA GCA CAA CG              | AZ5555            | GCA TAA GCA TCC CCA AG             | 55                   | 224           |
| RT_0286               | AZ5208            | GCA GGA TTT ATT AGT AGC AAC GG      | AZ5209            | ATT TGA CTG AAA AGA GGA GC         | 55                   | 120           |
| RT_0291               | AZ5210            | TTG TTT AGT TTC GTG TGT C           | AZ5211            | CTT TCG CTC TTC AAG TTT ATC        | 55                   | 175           |
| RT_0301               | AZ5212            | TGT TCT GTT TTG TAT GCC G           | AZ5213            | TTG CTT TGT TTG GGT TAT G          | 55                   | 115           |
| RT_0312               | AZ5186            | AAA GGT TTG CCA CCA GGT CC          | AZ5187            | TTA TTA GAA AAA TGA TGC CCA CCC    | 55                   | 128           |
| RT_0331               | AZ5182            | TGT CAC TTT CTA CTA TTG CG          | AZ5183            | GGC TAT TAT CAT TTT TAC ATT GTC C  | 55                   | 129           |
| RT_0338               | AZ5556            | TTA ATC ATT TCG GCA TTG C           | AZ5557            | ACT TTC CAT CTT CCT TTA TCG        | 55                   | 102           |
| RT_0355               | AZ5562            | GCA CCT AAA AAT ACG CAG             | AZ5563            | TAC CGA GCC TTC ATC AGA GG         | 55                   | 126           |
| RT_0358               | AZ5392            | ATA CTC ATA ACT ATC CTT AG          | AZ5393            | AAA CCT TGT GGA ATA CG             | 55                   | 116           |
| RT_0377               | AZ5564            | AAG CAC ATA ATG CCC AAG             | AZ5565            | TCT AAA GAT AAC TTA CCT GAT TC     | 60                   | 103           |
| RT_0379               | AZ5396            | TGG CAT TGT AGC ATC AAA AG          | AZ5397            | ACT CTT CCT TGC GAT ACT TC         | 60                   | 144           |
| RT_0382               | AZ5398            | TCG TGA AAA AAT AGT GAT GC          | AZ5399            | CTG TAT CTT GAT GAA AAT CTC C      | 55                   | 101           |
| RT_0383               | AZ5400            | CAG GGT AAA GTC CAG GTT GG          | AZ5401            | TTC GTG TAT CGG TAA TGA TTC        | 55                   | 114           |
| RT_0388               | AZ5402            | CAT TTA GAG CGG ATA GAA GAG         | AZ5403            | GCT TTT GAC CAT TTG ACG            | 55                   | 142           |
| RT_0390               | AZ5404            | GGA GTT TAC GAG GTG GTT ATG         | AZ5405            | TCC ATC CCC ATT CTT GTG            | 55                   | 141           |
| RT_0393               | AZ5406            | GCA TTT TTT TCT GAA GAT GG          | AZ5407            | CCG AGT ATT GGA TGT TTT CTA TTA C  | 55                   | 110           |
| RT_0399               | AZ5410            | CTT GTC CAA ATG CCA CAG             | AZ5411            | GTG TCA TCA TCA TCT TCA CG         | 55                   | 148           |
| RT_0406               | AZ5412            | AAG AAC AGA AAT GGG ATG AG          | AZ5413            | CAA TGC TGC TTG CCA GAG            | 55                   | 134           |
| RT_0417               | AZ5414            | TAG GGA ATC AAA ACG GTG             | AZ5415            | TTC TGA AGC ATC GCC AAG            | 60                   | 158           |
| RT_0438               | AZ5416            | ACT ACA GGC ATT GAC GGT C           | AZ5417            | CAC GCA AAA CAT TTA TTG TGT C      | 55                   | 118           |
| RT_0475               | AZ5424            | TTG TAA CAT TCT TAT TAG AGA GGA G   | AZ5425            | GAT TCC ACT TGA AAA CAT CAC        | 55                   | 122           |
| RT_0548               | AZ5432            | GAG AGT AAA CTG GTA AAA AGC C       | AZ5433            | CTG CTA CAA ACT GTT CAA GC         | 55                   | 124           |
| RT_0551               | AZ5434            | AGT TGC TCC GAA TCC ACA C           | AZ5435            | CAA GAA GTA AAA TCT ATC CCT G      | 60                   | 203           |
| RT_0561               | AZ5576            | ATG TCG CTT CTA ATC ATT CAG         | AZ5577            | AAA ATA CAT AGC AGA GTT GC         | 55                   | 122           |
| RT_0565               | AZ5438            | ACA GAT AAG ATG TTT GAT GAC G       | AZ5439            | TAA CCC CAC CAT TTG AAG            | 55                   | 202           |
| RT_0667               | AZ5442            | GCA ACT GAG TGA CTT AGC AAT C       | AZ5443            | AGC GTT ATC TAT CTC GTC TTG        | 55                   | 100           |
| RT_0692               | AZ5671            | GCT TCA GTC ACC ACA AC              | AZ5672            | GTT TTT GAG CAT CAG TAG C          | 55                   | 145           |
| RT_0697               | AZ5448            | TAT TAC CGC TTC TTC CCC             | AZ5449            | TTG TTC CGT TAT TAC CGA G          | 55                   | 197           |
| RT_0699               | AZ5578            | ATA CTA CTC CTG ATG CCG C           | AZ5579            | CAT TGC CAT TCT TAC TGA CC         | 55                   | 114           |
| RT_0711               | AZ5450            | GCA TAC AAA ACA GGG ACG             | AZ5451            | ACT CGC ATA AAA TCT ATC TGG        | 55                   | 165           |
| RT_0733               | AZ5452            | TTT AGC GTC CTG TCA AAT ACC         | AZ5453            | ATC CGA GCC GTC ATA AGA C          | 55                   | 199           |
| RT_0758               | AZ5454            | AAA AAC CAC ACA AAT GGC             | AZ5455            | GAA GCA CTA TCA AAA GCA AAC        | 55                   | 111           |
| RT_0761               | AZ5506            | CTG CCA TTA TTA GCC TCG             | AZ5507            | AAG TTC CGT ATC ATC TAT TGC G      | 55                   | 211           |
| RT_0773               | AZ5468            | GTA AGA ACA CTT CAG GTA ACG CTG C   | AZ5469            | GCA TTA GCA CTT GGA CAG TCT GG     | 55                   | 178           |
| RT_0775               | AZ5675            | CTA TTA CTT CAT TAC TAT TGG G       | AZ5676            | TAT TCC TAT TGC TGC TCC            | 55                   | 210           |
| RT_0797               | AZ5677            | TAC AAA TAG GTG GCA CAG             | AZ5678            | CTT CAG ATA AAC CAT CCT C          | 55                   | 123           |
| RT_0807               | AZ5679            | TCA GAG GGT ATT ACA GAG TAG         | AZ5680            | TCA CAT TCC TTC TTG AAA G          | 55                   | 229           |
| RT_0810               | AZ5476            | TGT CGG GTT TGG TAT CAA G           | AZ5477            | ATA AGG CTT TTT AGG ATT CG         | 55                   | 207           |
| RT_0815               | AZ5478            | CAT TTC ATT TGC TGA TTG TG          | AZ5479            | CCT ACA CCG ACA TTA CCA AC         | 55                   | 180           |
| RT_0816               | AZ5480            | CGT TTT AGT GAG CCA TAA GC          | AZ5481            | TGT TCT ACC ATC ATC TAT CCA G      | 55                   | 277           |
| RT_0821               | AZ5690            | TGG AAC ACT TCT TGG TGG C           | AZ5691            | GTT TTC TAT CCT GCT CAT CC         | 55                   | 152           |
| RT_0825               | AZ5482            | TTG AAG GAG ATG GGC ACC TCA C       | AZ5483            | AAA GGA GTG TAT TGA CAA GGG CG     | 55                   | 142           |
| RT_0858               | AZ5584            | CCA ATT AGC AAT GTG GGC AGC         | AZ5585            | TTC TCC GAC TTG GGT AGA CC         | 55                   | 136           |

**Table S4.**

| <i>Signal peptide prediction by the following programs:</i> |           |                    |                     | Total unique proteins<br>with predicted<br>signal peptides | Signal peptides<br>tested<br>( <i>'PhoA</i> assay) | Positive<br>signal<br>peptides | Percent positive<br>signal peptides of<br>those tested |
|-------------------------------------------------------------|-----------|--------------------|---------------------|------------------------------------------------------------|----------------------------------------------------|--------------------------------|--------------------------------------------------------|
| Phobius                                                     | LipoP 1.0 | SignalP 3.0:<br>NN | SignalP 3.0:<br>HMM |                                                            |                                                    |                                |                                                        |
| ×                                                           | ×         | ×                  | ×                   | 50                                                         | 50                                                 | 47                             | 94%                                                    |
| ×                                                           | ×         | ×                  |                     | 1                                                          | 1                                                  | 1                              | 100%                                                   |
| ×                                                           | ×         |                    | ×                   | 5                                                          | 2                                                  | 2                              | 100%                                                   |
| ×                                                           |           | ×                  | ×                   | 8                                                          | 3                                                  | 3                              | 100%                                                   |
| ×                                                           | ×         |                    |                     | 2                                                          | 2                                                  | 2                              | 100%                                                   |
| ×                                                           |           | ×                  |                     | 9                                                          | 2                                                  | 1                              | 50%                                                    |
| ×                                                           |           |                    | ×                   | 9                                                          | 3                                                  | 1                              | 33%                                                    |
| ×                                                           |           |                    |                     | 22                                                         | 10                                                 | 8                              | 80%                                                    |
|                                                             | ×         | ×                  | ×                   | 6                                                          | 3                                                  | 3                              | 100%                                                   |
|                                                             | ×         | ×                  |                     | 1                                                          | 0                                                  | ---                            | ---                                                    |
|                                                             | ×         |                    | ×                   | 1                                                          | 0                                                  | ---                            | ---                                                    |
|                                                             | ×         |                    |                     | 1                                                          | 0                                                  | ---                            | ---                                                    |
|                                                             |           | ×                  | ×                   | 12                                                         | 1                                                  | 1                              | 100%                                                   |
|                                                             |           | ×                  |                     | 49                                                         | 16                                                 | 8                              | 50%                                                    |
|                                                             |           |                    | ×                   | 15                                                         | 9                                                  | 7                              | 78%                                                    |

Table S4-1

**Table S5:**

| <b>Locus Tag</b> | <b>Product Name</b>                                                    | <b>Relative Q: Infection 1</b> | <b>Relative Q: Infection 2</b> | <b>Relative Q: Infection 3</b> | <b>Mean Relative Quantity</b> | <b>Standard Deviation</b> | <b>Standard Error</b> |
|------------------|------------------------------------------------------------------------|--------------------------------|--------------------------------|--------------------------------|-------------------------------|---------------------------|-----------------------|
| RT0013           | probable zinc/manganese ABC transporter substrate binding protein ZnuA | No Ct                          | No Ct                          | No Ct                          | No Ct                         | ---                       | ---                   |
| RT0015           | 190 kDa antigen precursor (Sca1)                                       | 0.011110083                    | 0.004365913                    | 0.059846463                    | 0.025                         | 0.030                     | 0.017                 |
| RT0028           | VirB6-like protein                                                     | 0.005703138                    | 0.003141588                    | 0.003986236                    | 0.004                         | 0.001                     | 0.001                 |
| RT0029           | VirB6-like protein                                                     | 0.079140278                    | 0.040992969                    | 0.121653138                    | 0.081                         | 0.040                     | 0.023                 |
| RT0030           | VirB6-like protein                                                     | 0.002926426                    | 0.020918305                    | 0.004173260                    | 0.009                         | 0.010                     | 0.006                 |
| RT0043           | hypothetical protein                                                   | 0.245562935                    | 0.317017332                    | 0.463361474                    | 0.342                         | 0.111                     | 0.064                 |
| RT0044           | VacJ lipoprotein precursor                                             | 0.107567861                    | 1.527939398                    | 0.406513869                    | 0.681                         | 0.749                     | 0.432                 |
| RT0052           | 190 kDa antigen precursor (Sca2)                                       | 0.017050105                    | 0.008980668                    | 0.229325486                    | 0.085                         | 0.125                     | 0.072                 |
| RT0056           | hypothetical protein                                                   | 0.010943831                    | 0.049356039                    | 0.154249571                    | 0.072                         | 0.074                     | 0.043                 |
| RT0057           | OmpW-like outer membrane protein                                       | 0.001242463                    | 0.140881968                    | 0.400830730                    | 0.181                         | 0.203                     | 0.117                 |
| RT0064           | rickettsial conserved hypothetical protein                             | 0.638716584                    | 2.858102683                    | 0.585190268                    | 1.361                         | 1.297                     | 0.749                 |
| RT0080           | rickettsial conserved hypothetical protein                             | 0.041814398                    | 0.101236953                    | 0.276188051                    | 0.140                         | 0.122                     | 0.070                 |
| RT0103           | hypothetical protein                                                   | 0.000941951                    | 0.529819764                    | 0.162095313                    | 0.231                         | 0.271                     | 0.157                 |
| RT0136           | conserved hypothetical protein                                         | 1.799011613                    | 0.889399786                    | 1.214912201                    | 1.301                         | 0.461                     | 0.266                 |
| RT0150           | outer membrane protein Omp1                                            | 1.057665781                    | 1.448506977                    | 4.547502524                    | 2.351                         | 1.912                     | 1.104                 |
| RT0174           | probable lipoprotein                                                   | 0.002394669                    | 1.174718304                    | 0.080919614                    | 0.419                         | 0.655                     | 0.378                 |
| RT0178           | rickettsial conserved hypothetical protein                             | 0.009100271                    | 0.020162492                    | 0.006352933                    | 0.012                         | 0.007                     | 0.004                 |

| <b>Locus Tag</b> | <b>Product Name</b>                                     | <b>Relative Q: Infection 1</b> | <b>Relative Q: Infection 2</b> | <b>Relative Q: Infection 3</b> | <b>Mean Relative Quantity</b> | <b>Standard Deviation</b> | <b>Standard Error</b> |
|------------------|---------------------------------------------------------|--------------------------------|--------------------------------|--------------------------------|-------------------------------|---------------------------|-----------------------|
| RT0187           | hypothetical protein                                    | (suitable primers not found)   |                                |                                | ---                           | ---                       | ---                   |
| RT0188           | rickettsial conserved hypothetical protein              | No Ct                          | No Ct                          | No Ct                          | No Ct                         | ---                       | ---                   |
| RT0216           | outer membrane protein TolC precursor                   | 0.028516125                    | 1.228208039                    | 1.389976994                    | 0.882                         | 0.744                     | 0.429                 |
| RT0218           | rickettsial conserved hypothetical protein              | 0.001042515                    | 0.084538709                    | 0.062760108                    | 0.049                         | 0.043                     | 0.025                 |
| RT0222           | hypothetical protein                                    | 0.023319972                    | 2.879611690                    | 3.388108380                    | 2.097                         | 1.814                     | 1.047                 |
| RT0224           | hypothetical protein                                    | 0.084383773                    | 0.156574370                    | 0.053473193                    | 0.098                         | 0.053                     | 0.031                 |
| RT0247           | rickettsial conserved hypothetical protein              | No Ct                          | No Ct                          | No Ct                          | No Ct                         | ---                       | ---                   |
| RT0260           | rickettsial conserved hypothetical protein              | 0.547668148                    | 0.058169415                    | 0.244335670                    | 0.283                         | 0.247                     | 0.143                 |
| RT0263           | cytochrome c1 heme protein precursor (FbcH)             | 0.092690670                    | 0.071437787                    | No Ct                          | 0.082                         | 0.015                     | 0.009                 |
| RT0276           | hypothetical protein                                    | (suitable primers not found)   |                                |                                | ---                           | ---                       | ---                   |
| RT0279           | rickettsial conserved hypothetical protein              | 0.019216470                    | 1.093064026                    | 0.353033152                    | 0.488                         | 0.550                     | 0.317                 |
| RT0281           | VirB9 protein precursor                                 | No Ct                          | No Ct                          | No Ct                          | No Ct                         | ---                       | ---                   |
| RT0286           | rickettsial conserved hypothetical protein              | 0.018355243                    | 2.757807188                    | 1.985461377                    | 1.587                         | 1.412                     | 0.815                 |
| RT0287           | rickettsial conserved hypothetical protein              | (suitable primers not found)   |                                |                                | ---                           | ---                       | ---                   |
| RT0291           | outer membrane antigenic lipoprotein B precursor (NlpD) | 0.021351110                    | 0.151997936                    | 0.120208324                    | 0.098                         | 0.068                     | 0.039                 |
| RT0301           | rickettsial conserved hypothetical protein              | 0.038917140                    | 0.018021874                    | 0.069999623                    | 0.042                         | 0.026                     | 0.015                 |
| RT0312           | hypothetical protein                                    | 0.034368762                    | 0.142352457                    | 0.008944053                    | 0.062                         | 0.071                     | 0.041                 |
| RT0331           | probable efflux transporter                             | No Ct                          | No Ct                          | No Ct                          | No Ct                         | ---                       | ---                   |
| RT0338           | rickettsial conserved hypothetical protein              | No Ct                          | No Ct                          | No Ct                          | No Ct                         | ---                       | ---                   |

Table S5-2



| <b>Locus Tag</b> | <b>Product Name</b>                                      | <b>Relative Q: Infection 1</b> | <b>Relative Q: Infection 2</b> | <b>Relative Q: Infection 3</b> | <b>Mean Relative Quantity</b> | <b>Standard Deviation</b> | <b>Standard Error</b> |
|------------------|----------------------------------------------------------|--------------------------------|--------------------------------|--------------------------------|-------------------------------|---------------------------|-----------------------|
| RT0341           | hypothetical protein                                     | (suitable primers not found)   |                                |                                | ---                           | ---                       | ---                   |
| RT0348           | hypothetical protein                                     | (suitable primers not found)   |                                |                                | ---                           | ---                       | ---                   |
| RT0355           | hypothetical protein                                     | 0.147739536                    | 0.244939874                    | 0.034762053                    | 0.142                         | 0.105                     | 0.061                 |
| RT0358           | rickettsial conserved hypothetical protein               | No Ct                          | No Ct                          | No Ct                          | No Ct                         | ---                       | ---                   |
| RT0377           | D-alanyl-D-alanine carboxypeptidase (DacF)               | No Ct                          | No Ct                          | No Ct                          | No Ct                         | ---                       | ---                   |
| RT0379           | possible periplasmic protein                             | No Ct                          | 0.001038637                    | 0.007471753                    | 0.004                         | 0.005                     | 0.003                 |
| RT0382           | hypothetical protein                                     | 0.002379269                    | 0.029409841                    | 0.025736164                    | 0.019                         | 0.015                     | 0.008                 |
| RT0383           | rickettsial conserved hypothetical protein               | 0.002662744                    | 0.008162949                    | 0.044118506                    | 0.018                         | 0.023                     | 0.013                 |
| RT0388           | soluble lytic transglycosylase domain containing protein | 0.019315221                    | 0.014077434                    | 0.069247085                    | 0.034                         | 0.030                     | 0.018                 |
| RT0390           | carboxypeptidase IIW (LcdA)                              | 0.007601959                    | 0.026248174                    | 0.105327213                    | 0.046                         | 0.052                     | 0.030                 |
| RT0393           | hypothetical protein                                     | 0.016100393                    | 0.016164043                    | 0.082430462                    | 0.038                         | 0.038                     | 0.022                 |
| RT0395           | rickettsial conserved hypothetical protein               | (suitable primers not found)   |                                |                                | ---                           | ---                       | ---                   |
| RT0399           | rickettsial conserved hypothetical protein               | 0.025436293                    | 0.295025260                    | 0.108282184                    | 0.143                         | 0.138                     | 0.080                 |
| RT0406           | hypothetical protein                                     | 0.055658401                    | 0.070593178                    | 0.288023926                    | 0.138                         | 0.130                     | 0.075                 |
| RT0417           | hypothetical protein                                     | No Ct                          | No Ct                          | No Ct                          | No Ct                         | ---                       | ---                   |
| RT0438           | cell surface antigen Sca3                                | 0.039516005                    | 0.183548161                    | 0.055460210                    | 0.093                         | 0.079                     | 0.046                 |
| RT0444           | hypothetical protein                                     | (suitable primers not found)   |                                |                                | ---                           | ---                       | ---                   |
| RT0445           | rickettsial conserved hypothetical protein               | (suitable primers not found)   |                                |                                | ---                           | ---                       | ---                   |
| RT0465           | rickettsial conserved hypothetical protein               | (suitable primers not found)   |                                |                                | ---                           | ---                       | ---                   |
| RT0475           | rickettsial conserved hypothetical protein               | No Ct                          | No Ct                          | No Ct                          | No Ct                         | ---                       | ---                   |
| RT0491           | rickettsial conserved hypothetical protein               | (suitable primers not found)   |                                |                                | ---                           | ---                       | ---                   |

Table S5-3

| <b>Locus Tag</b> | <b>Product Name</b>                               | <b>Relative Q: Infection 1</b> | <b>Relative Q: Infection 2</b> | <b>Relative Q: Infection 3</b> | <b>Mean Relative Quantity</b> | <b>Standard Deviation</b> | <b>Standard Error</b> |
|------------------|---------------------------------------------------|--------------------------------|--------------------------------|--------------------------------|-------------------------------|---------------------------|-----------------------|
| RT0492           | rickettsial conserved hypothetical protein        | (suitable primers not found)   |                                |                                | ---                           | ---                       | ---                   |
| RT0546           | hypothetical protein                              | (suitable primers not found)   |                                |                                | ---                           | ---                       | ---                   |
| RT0548           | 2-octaprenyl-6-methoxyphenyl hydroxylase          | 0.074530521                    | 0.034295094                    | 0.672935328                    | 0.261                         | 0.358                     | 0.207                 |
| RT0551           | rickettsial conserved hypothetical protein        | No Ct                          | No Ct                          | No Ct                          | No Ct                         | ---                       | ---                   |
| RT0561           | hypothetical protein                              | 3.994727758                    | 1.194531970                    | 0.869289918                    | 2.020                         | 1.718                     | 0.992                 |
| RT0565           | protein export protein PrsA precursor             | 0.065640026                    | 0.893464842                    | 0.069143849                    | 0.343                         | 0.477                     | 0.275                 |
| RT0601           | hypothetical protein                              | (suitable primers not found)   |                                |                                | ---                           | ---                       | ---                   |
| RT0667           | rickettsial conserved hypothetical protein        | 0.763460965                    | 0.612946457                    | 8.429749483                    | 3.269                         | 4.470                     | 2.581                 |
| RT0692           | rickettsial conserved hypothetical protein        | 10.07058689                    | 70.20290743                    | 6.056181354                    | 28.777                        | 35.932                    | 20.746                |
| RT0694           | hypothetical protein                              | (suitable primers not found)   |                                |                                | ---                           | ---                       | ---                   |
| RT0697           | hypothetical protein                              | 0.025317437                    | 0.227843101                    | 0.044870397                    | 0.099                         | 0.112                     | 0.064                 |
| RT0699           | rickettsial outer membrane protein B (rOmpB/Sca5) | 7.201565814                    | 1.692332671                    | 8.078805305                    | 5.658                         | 3.462                     | 1.999                 |
| RT0711           | conserved hypothetical protein                    | 0.073186551                    | 0.260091050                    | 0.233591293                    | 0.189                         | 0.101                     | 0.058                 |
| RT0733           | rickettsial conserved hypothetical protein        | 0.010496190                    | 0.011886574                    | 0.141913689                    | 0.055                         | 0.075                     | 0.044                 |
| RT0758           | peptidoglycan-associated protein precursor (Pal)  | 9.694051352                    | 21.46235940                    | 77.74269472                    | 36.300                        | 36.370                    | 20.998                |
| RT0761           | hypothetical protein                              | 0.144178305                    | No Ct                          | No Ct                          | No Ct                         | ---                       | ---                   |
| RT0767           | rickettsial conserved hypothetical protein        | (suitable primers not found)   |                                |                                | ---                           | ---                       | ---                   |
| RT0773           | rickettsial conserved hypothetical protein        | No Ct                          | No Ct                          | 0.020797841                    | ---                           | ---                       | ---                   |
| RT0775           | rickettsial conserved hypothetical protein        | No Ct                          | No Ct                          | No Ct                          | No Ct                         | ---                       | ---                   |

Table S5-4

| <b>Locus Tag</b> | <b>Product Name</b>                          | <b>Relative Q: Infection 1</b> | <b>Relative Q: Infection 2</b> | <b>Relative Q: Infection 3</b> | <b>Mean Relative Quantity</b> | <b>Standard Deviation</b> | <b>Standard Error</b> |
|------------------|----------------------------------------------|--------------------------------|--------------------------------|--------------------------------|-------------------------------|---------------------------|-----------------------|
| RT0797           | hypothetical protein                         | 0.002530644                    | 0.008030032                    | 0.005577185                    | 0.005                         | 0.003                     | 0.002                 |
| RT0807           | phospholipase D (Pld)                        | No Ct                          | No Ct                          | No Ct                          | No Ct                         | ---                       | ---                   |
| RT0810           | rickettsial conserved hypothetical protein   | 0.058940437                    | 0.023738198                    | 0.067277959                    | 0.050                         | 0.023                     | 0.013                 |
| RT0815           | possible outer surface protein               | 0.804070529                    | 1.218612417                    | 0.330314593                    | 0.784                         | 0.444                     | 0.257                 |
| RT0816           | possible outer surface protein               | 2.226559514                    | 0.805955731                    | 0.222351553                    | 1.085                         | 1.031                     | 0.595                 |
| RT0821           | rickettsial 17 kDa surface antigen precursor | 2.023886716                    | 0.231392112                    | 0.463509139                    | 0.906                         | 0.975                     | 0.563                 |
| RT0825           | hypothetical protein                         | 0.002925065                    | 0.130717864                    | 0.299473943                    | 0.144                         | 0.149                     | 0.086                 |
| RT0858           | hypothetical protein                         | 0.030795745                    | 0.408287763                    | 1.341995025                    | 0.594                         | 0.675                     | 0.390                 |

Table S5-5
